# Supplementary material for: Rh nanoparticles from thiolate dimers: selective and reusable hydrogenation catalysts in ionic liquids
Source: Royal Society of Chemistry journal article supplement (doi:10.1039/c8cy00227d), 2018-01-01
Supplement: c8cy00227d1.pdf [file c8cy00227d1.pdf]

## Rh nanoparticles from thiolate dimers: selective and reusable hydrogenation catalysts in ionic liquids

A. Serrano-Maldonado,\* S. S. Rozenel, J. L. Jimenez-Santiago, I. Guerrero-Ríos\* and E. Martín†

### Electronic Supplementary Information

#### Table of contents:

|                                                                                                                                                  |        |
|--------------------------------------------------------------------------------------------------------------------------------------------------|--------|
| [Rh( $\mu$ -SC <sub>12</sub> H <sub>25</sub> )(COD)] <sub>2</sub> (I). NMR, MS and IR spectra<br>-Figures S1-S7.....                             | II     |
| [Rh( $\mu$ -SC <sub>6</sub> H <sub>11</sub> )(COD)] <sub>2</sub> (I). NMR, MS and IR spectra<br>-Figures S8-S14.....                             | V      |
| TEM images, size distribution and EDS<br>-Figures S15-S20.....                                                                                   | IX     |
| RhNPs-B and RhNPs-B/THF XPS spectra<br>-Figures S21-S25.....                                                                                     | XV     |
| Catalytic results<br>-Tables S1-S6 and Figures S26-S31.....                                                                                      | XX     |
| <sup>1</sup> H NMR monitoring of 4-nitroacetophenone and <i>p</i> -benzoquinone hydrogenation<br>-Figures S32-S34.....                           | XXIV   |
| <sup>1</sup> H NMR spectrum of 4-aminoacetophenone. Hydrogenation product of 4-nitroacetophenone catalyzed by <b>RhNPs-C</b><br>-Figure S35..... | XXVII  |
| <sup>1</sup> H NMR spectrum of product <i>N</i> -benzylaniline ( <b>10i</b> )<br>-Figure S36.....                                                | XXVIII |
| Crystal data and refinement structure of complexes I and II<br>-Tables S7 and S8.....                                                            | XXIX   |

Figure S1.  $^1\text{H}$  NMR of  $[\text{Rh}(\mu\text{-SC}_{12}\text{H}_{25})(\text{COD})]_2$  (I)

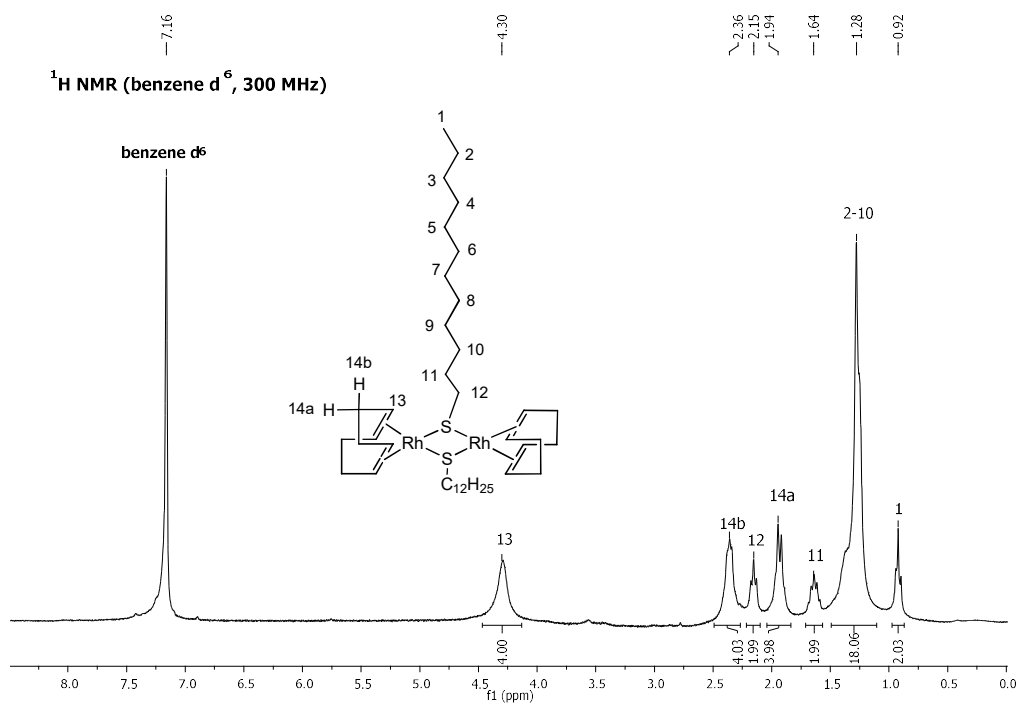

Figure S2.  $\{^1\text{H}\}$  COSY NMR of  $[\text{Rh}(\mu\text{-SC}_{12}\text{H}_{25})(\text{COD})]_2$  (I)

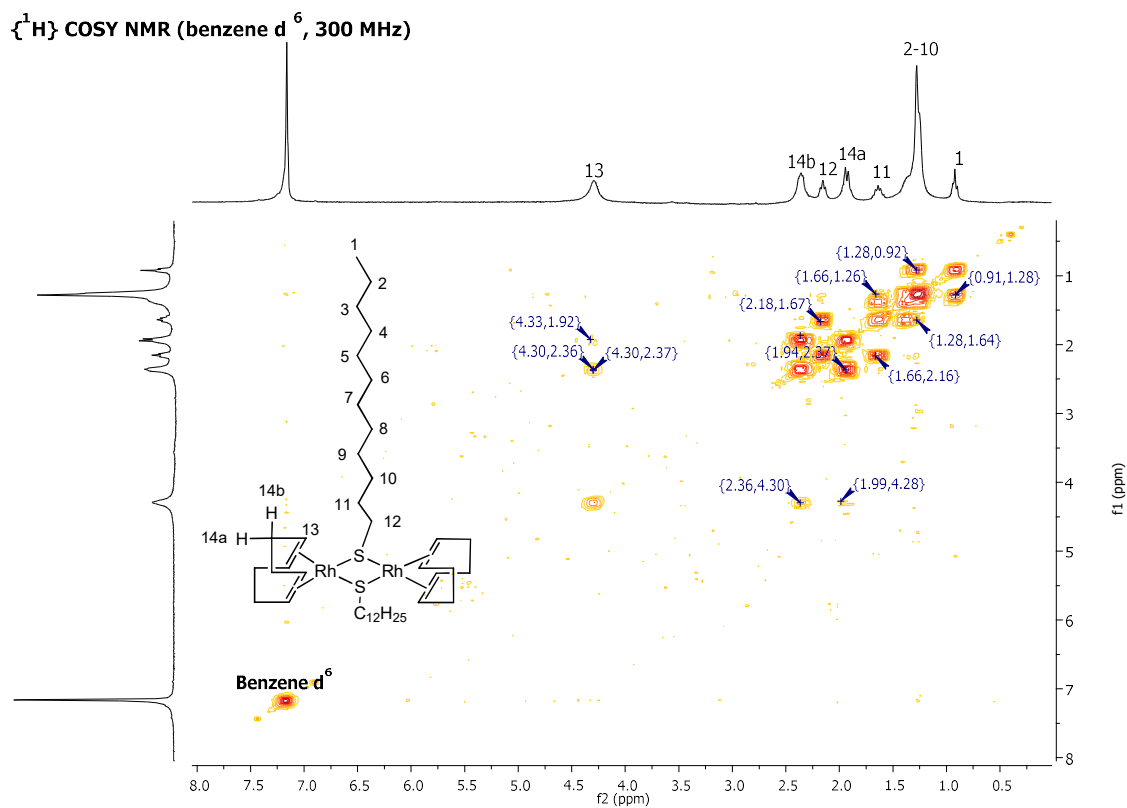



Figure S5. HMBC NMR of  $[\text{Rh}(\mu\text{-SC}_{12}\text{H}_{25})(\text{COD})]_2$  (I)

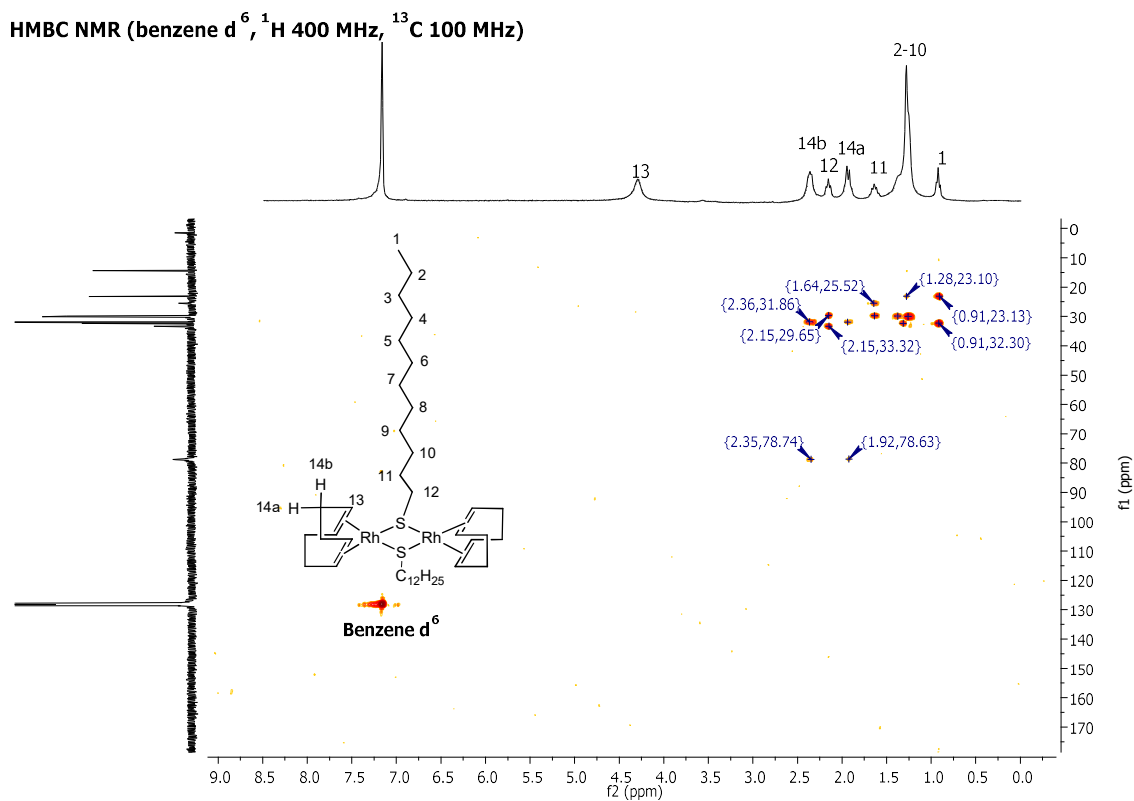

Figure S6. FTIR (KBr) of  $[\text{Rh}(\mu\text{-SC}_{12}\text{H}_{25})(\text{COD})]_2$  (I)

FTIR (KBr)

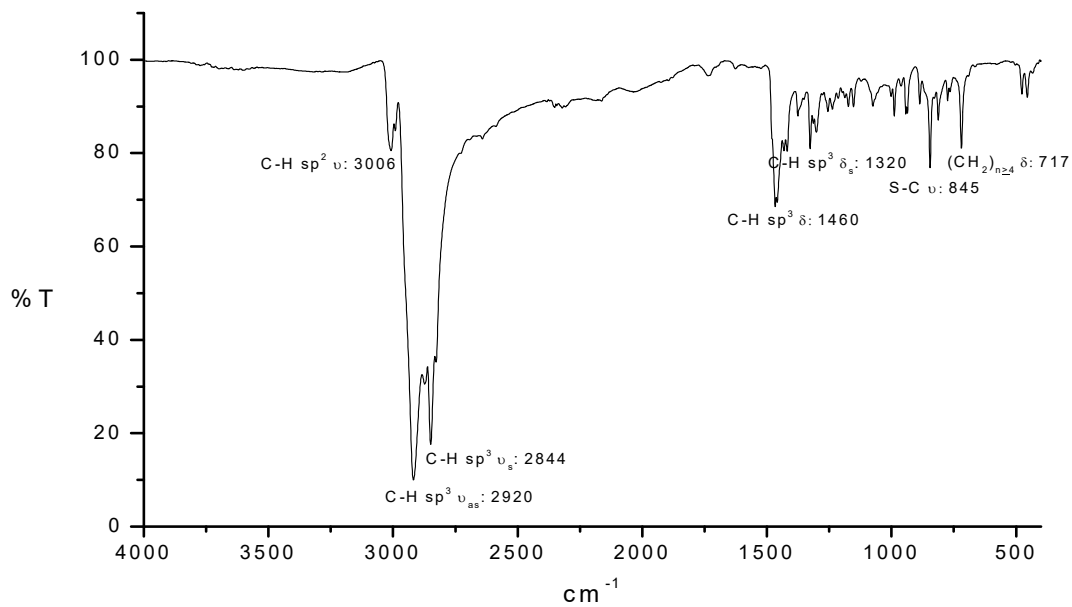

Figure S7. MS-FAB<sup>+</sup> of [Rh(μ-SC<sub>12</sub>H<sub>25</sub>)(COD)]<sub>2</sub> (I)

MS FAB<sup>+</sup>

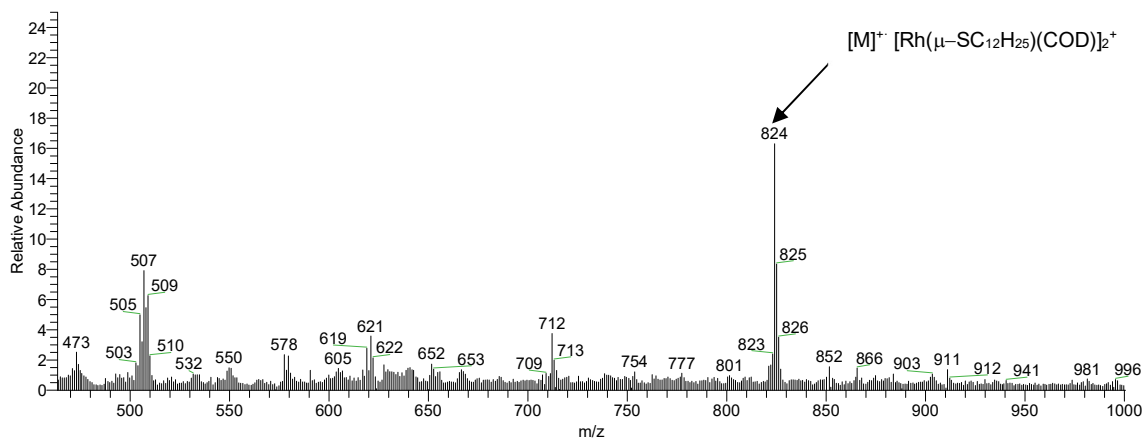

Figure S8. <sup>1</sup>H NMR of [Rh(μ-SC<sub>6</sub>H<sub>11</sub>)(COD)]<sub>2</sub> (II)

<sup>1</sup>H NMR (benzene d<sub>6</sub>, <sup>1</sup>H 300 MHz)

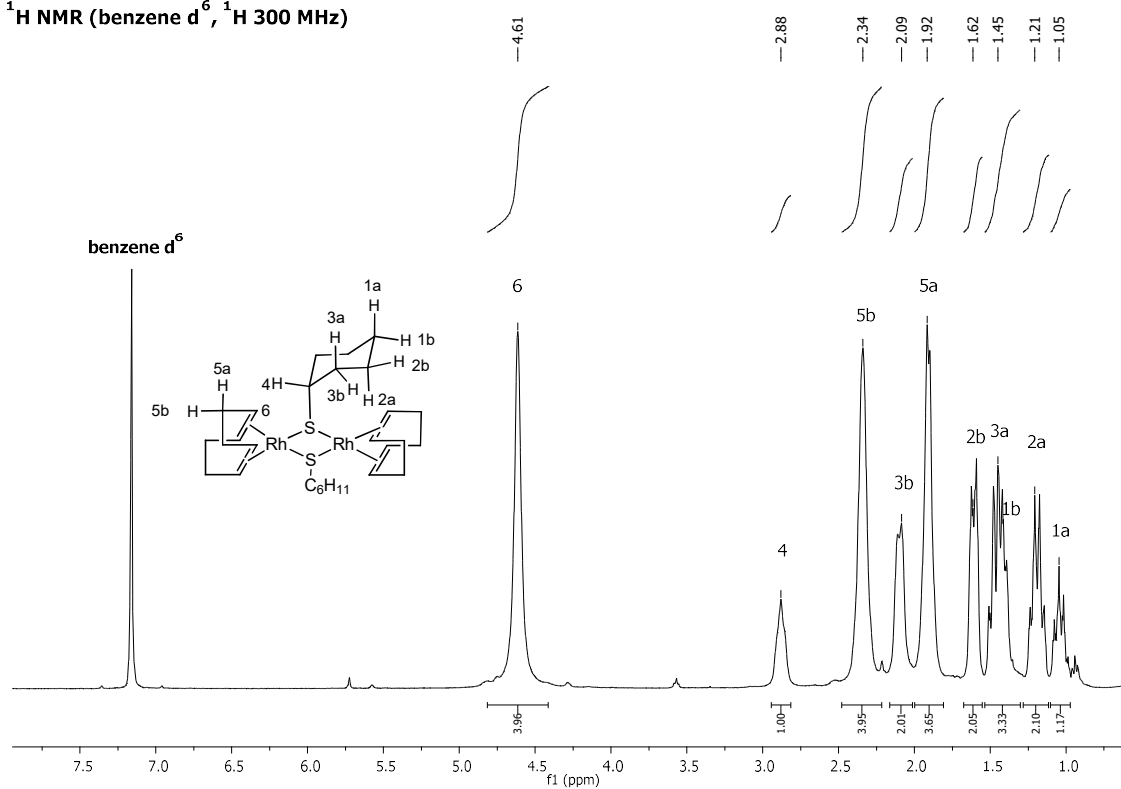

Figure S9.  $^1\text{H}$  NMR of  $[\text{Rh}(\mu\text{-SC}_6\text{H}_{11})(\text{COD})]_2$  (II)

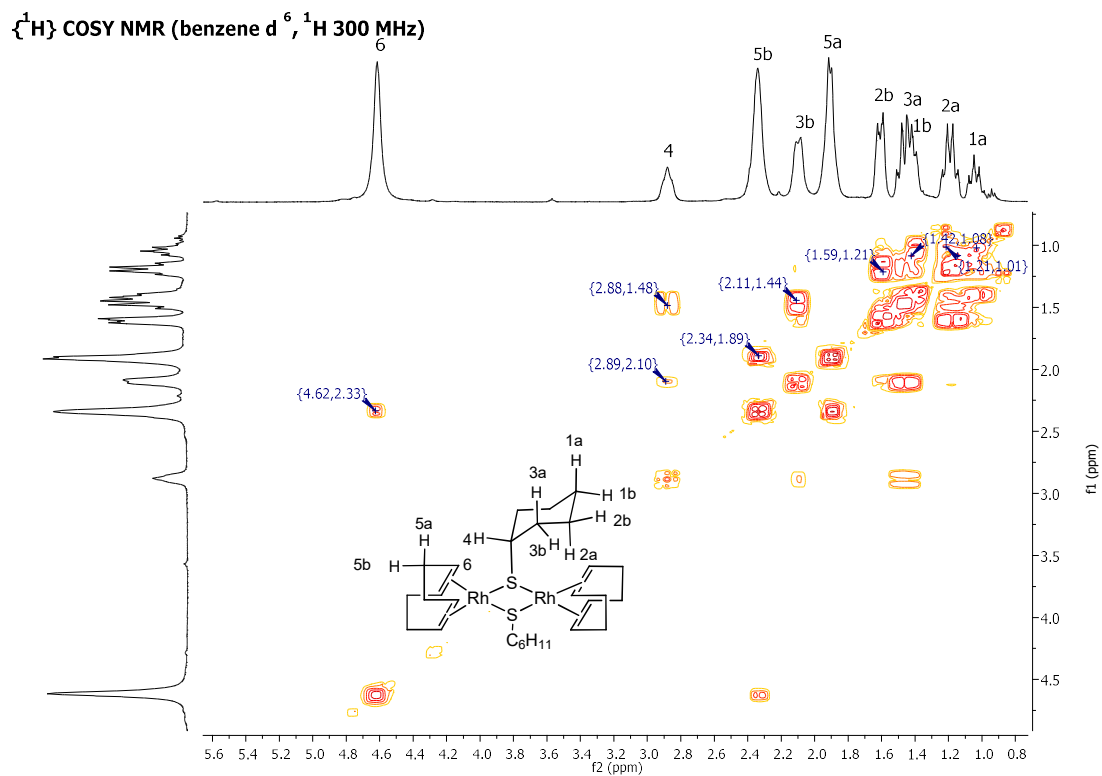

Figure S10.  $^{13}\text{C}$  NMR of  $[\text{Rh}(\mu\text{-SC}_6\text{H}_{11})(\text{COD})]_2$  (II)

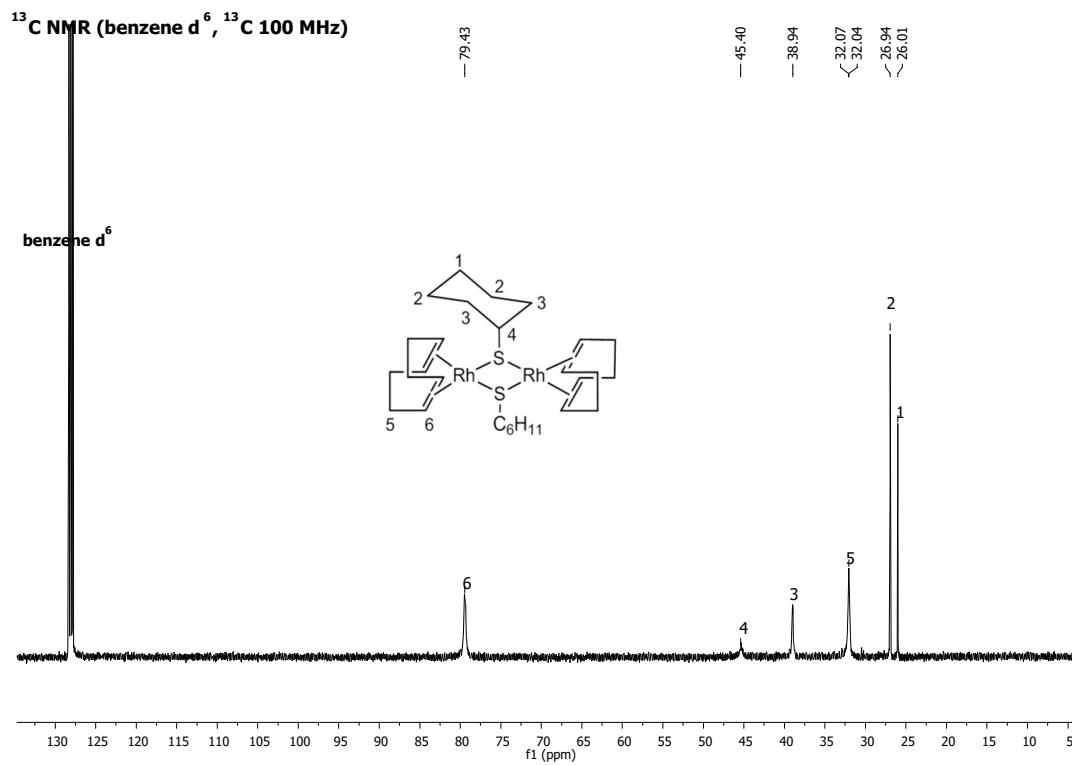

Figure S11. HSQC NMR of  $[\text{Rh}(\mu\text{-SC}_6\text{H}_{11})(\text{COD})]_2$  (II)

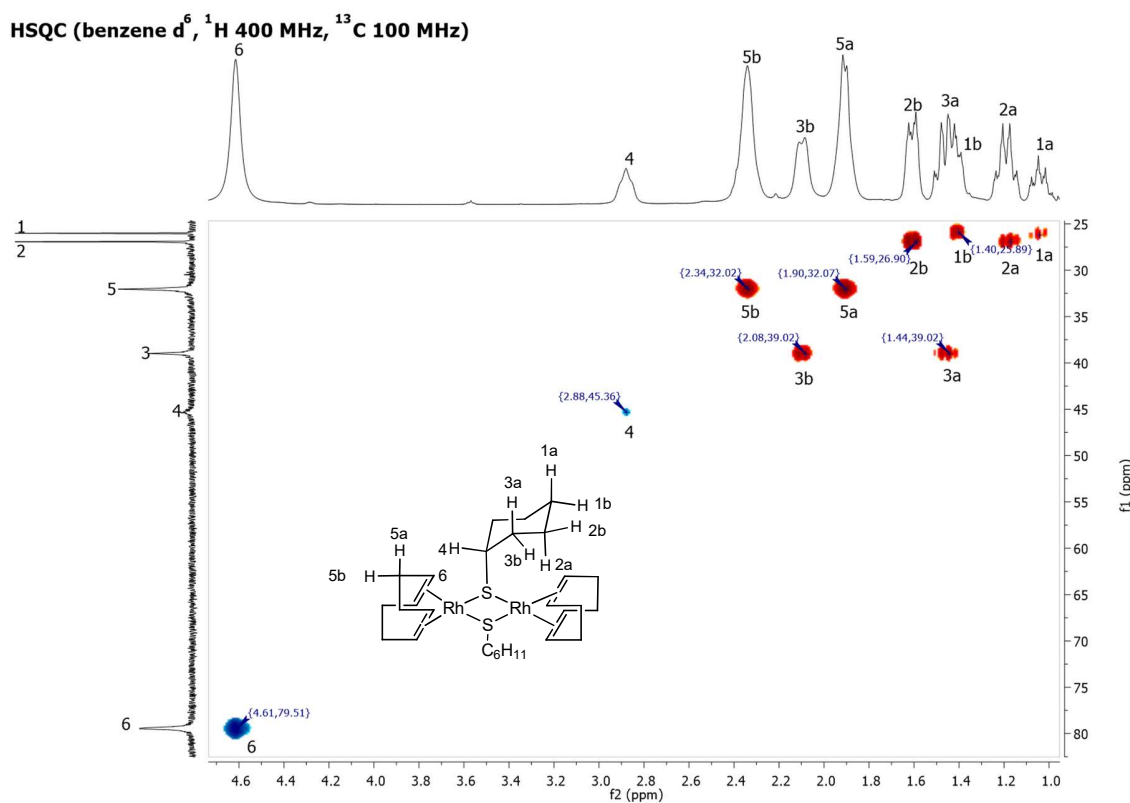

Figure S12. FTIR (KBr) of  $[\text{Rh}(\mu\text{-SC}_6\text{H}_{11})(\text{COD})]_2$  (II)

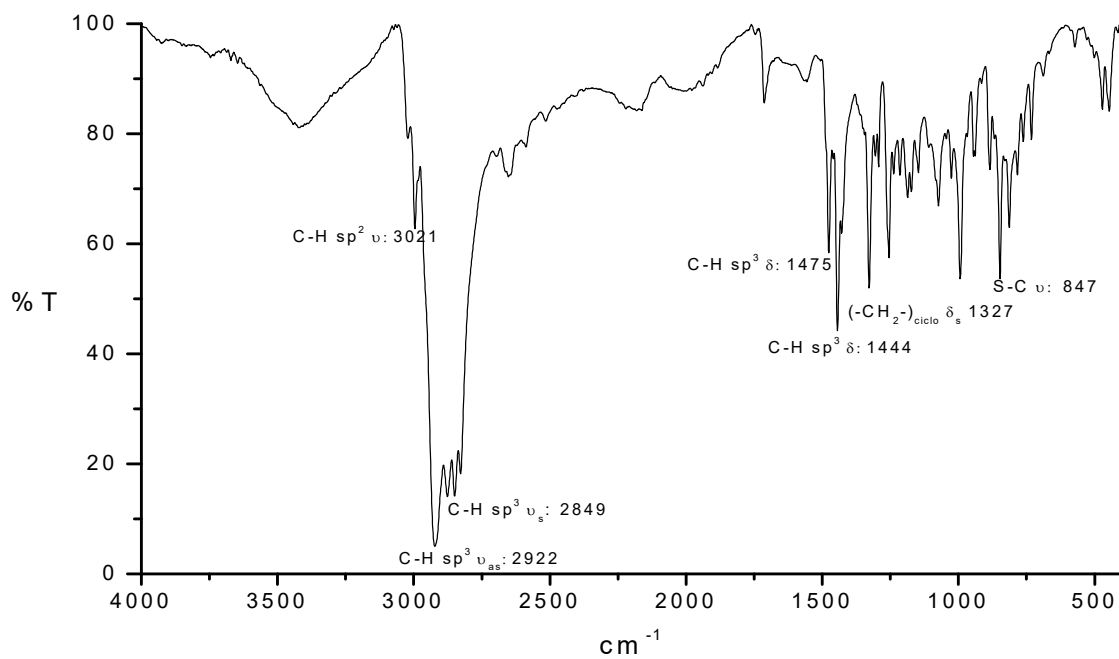

Figure S13. MS-FAB<sup>+</sup> of [Rh(μ-SC<sub>6</sub>H<sub>11</sub>)(COD)]<sub>2</sub> (II)

MS FAB<sup>+</sup>

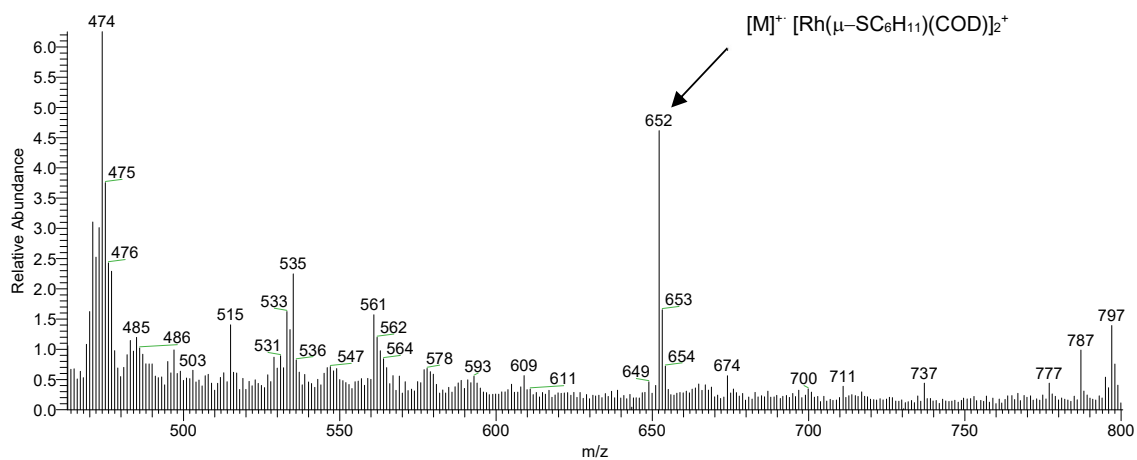

Figure S14. MS HR-ESI<sup>+</sup>

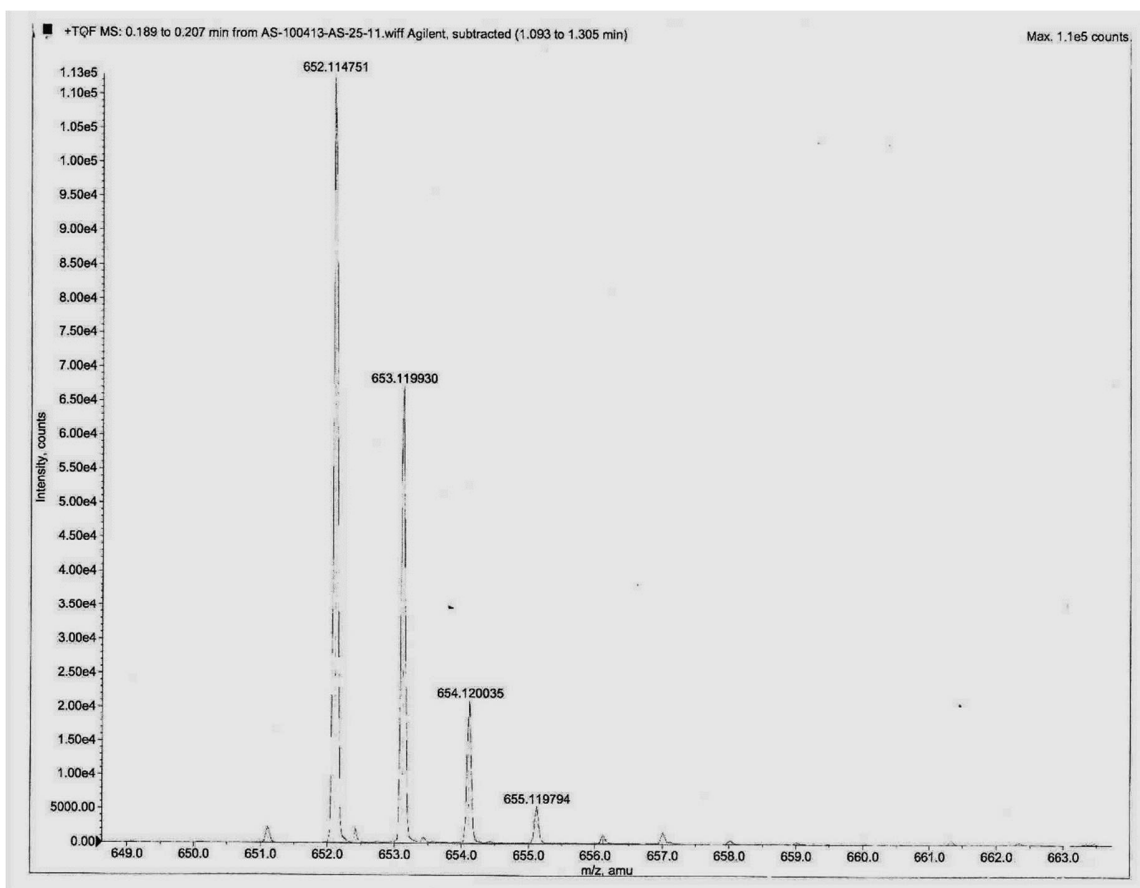



**Figure S15. TEM images, size distribution and EDX of RhNPs-A**

Mean diameter  $D = 2.66 \pm 0.22$  nm

TEM images

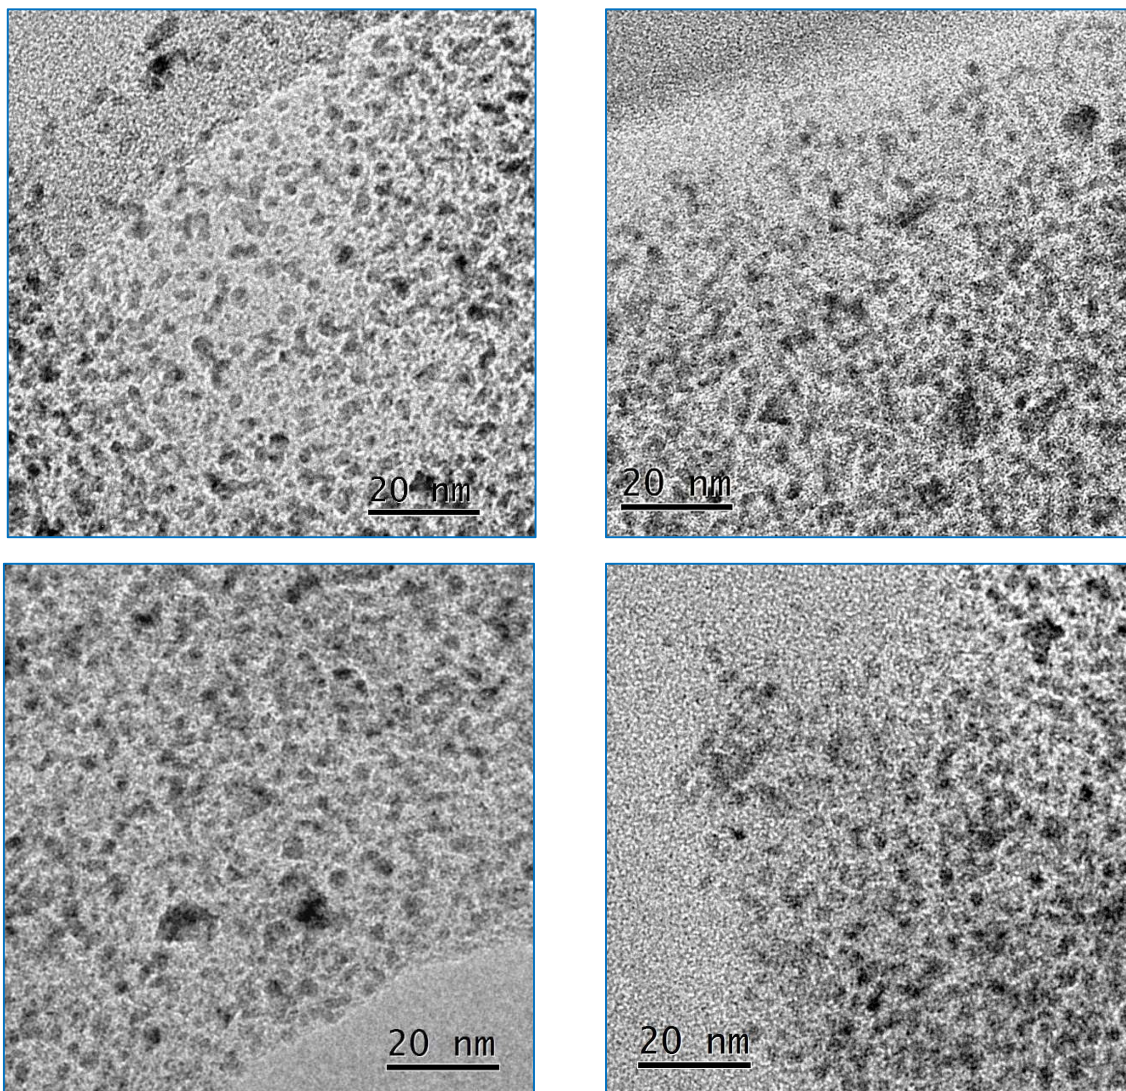

Size distribution and EDS

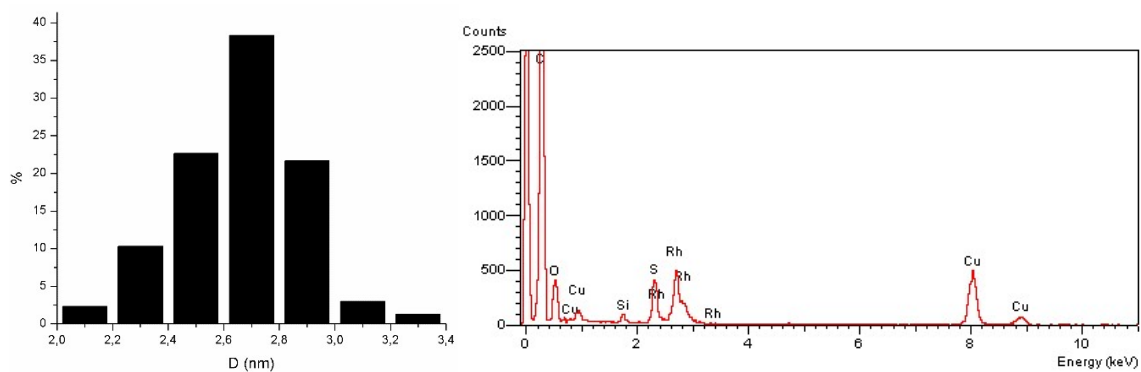

**Figure S16. TEM images, size distribution and EDX of RhNPs-B**

Mean diameter  $D = 2.81 \pm 0.26$  nm

TEM Images

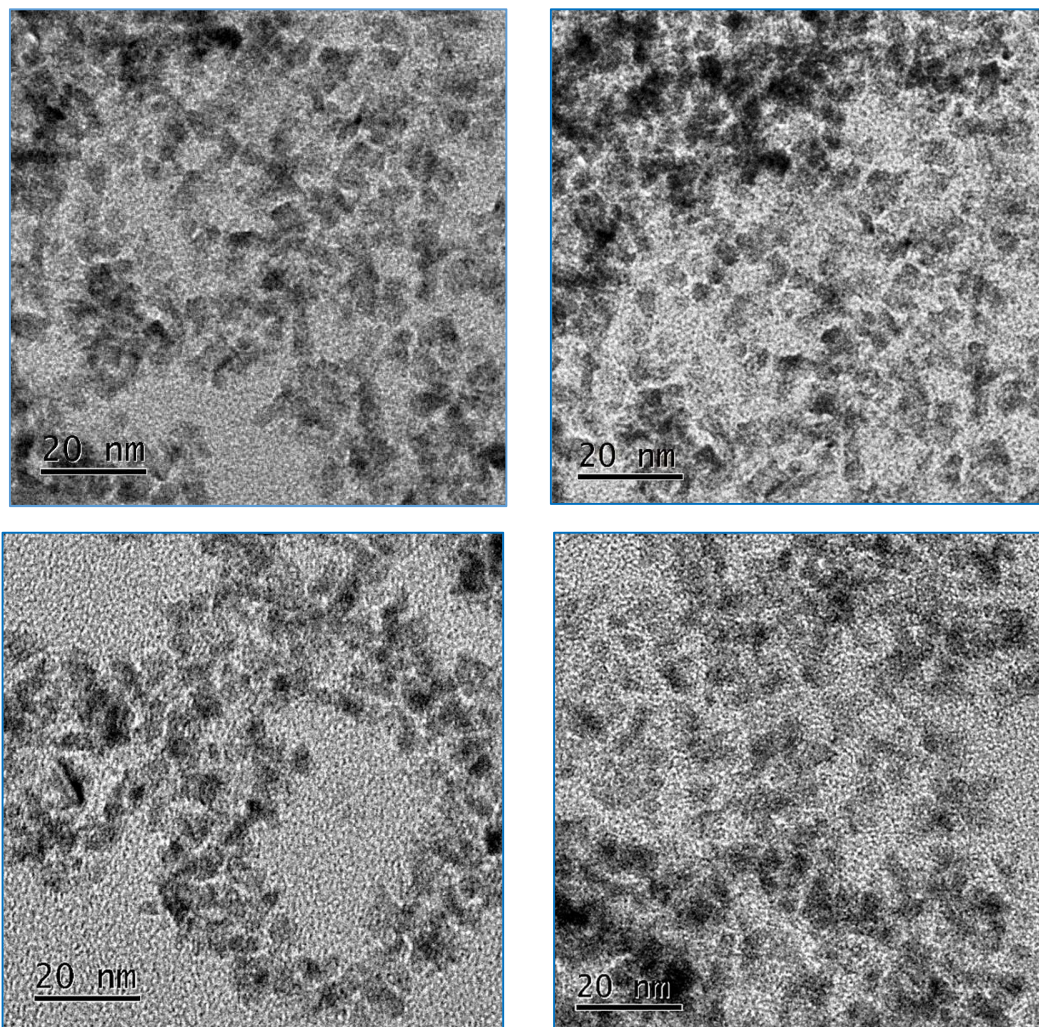

Size distribution and EDS

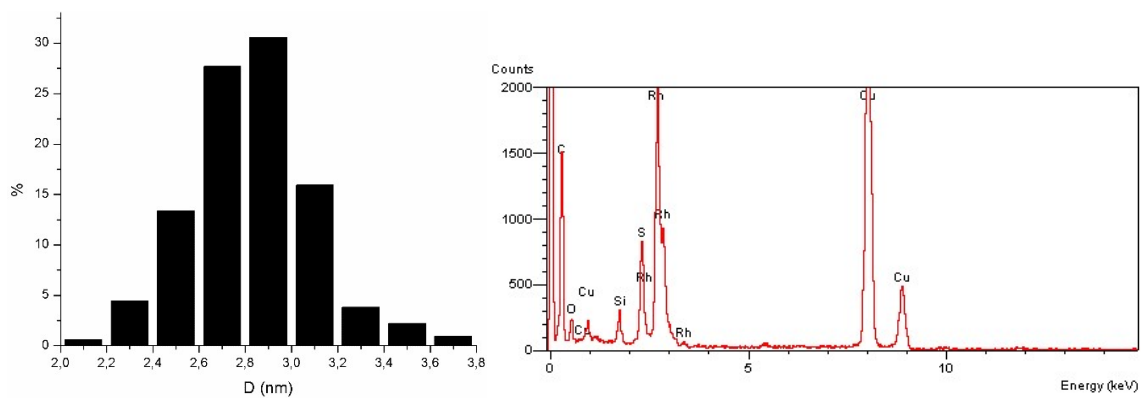

**Figure S17. TEM images, size distribution and EDX of RhNPs-A/THF**

Mean diameter  $D = 2.82 \pm 0.28$  nm

TEM images

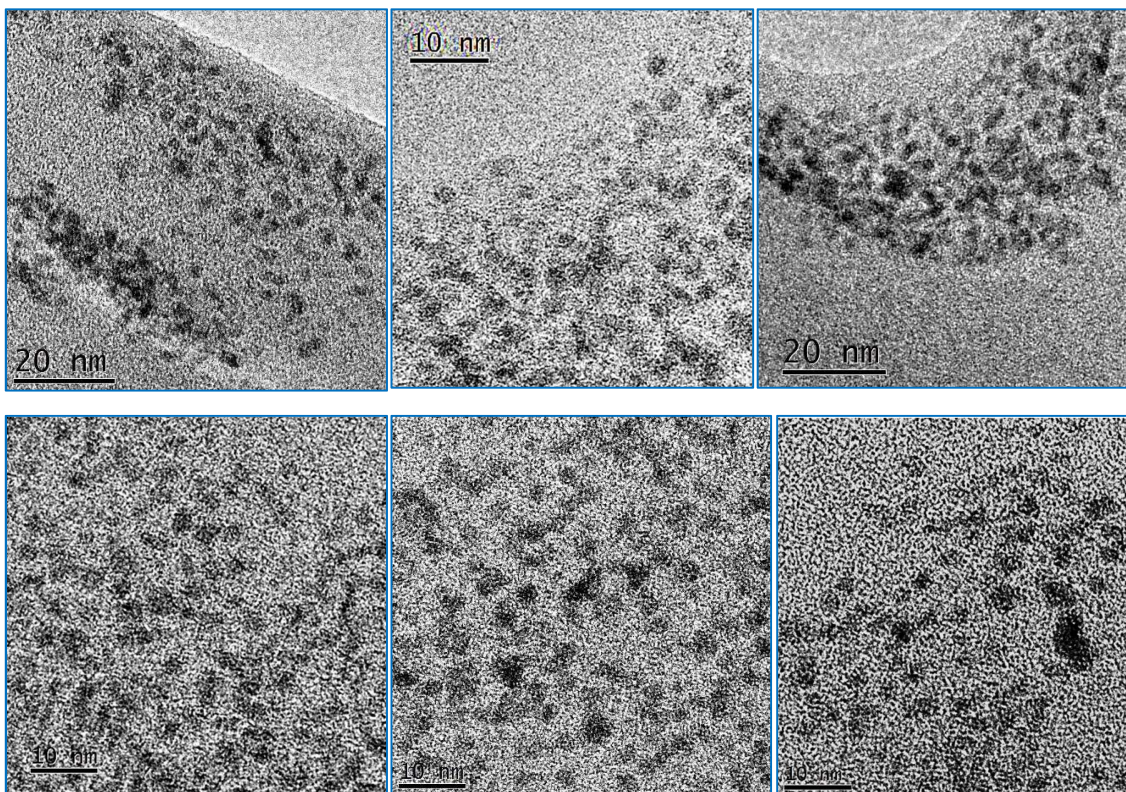

Size distribution and EDS

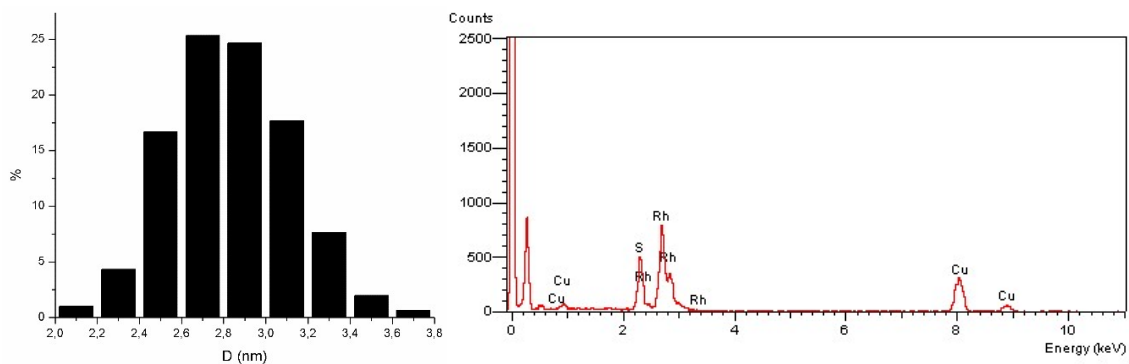

**Figure S18. TEM images, size distribution and EDX of RhNPs-B/THF**

Mean diameter  $D = 2.28 \pm 0.30$  nm

TEM images

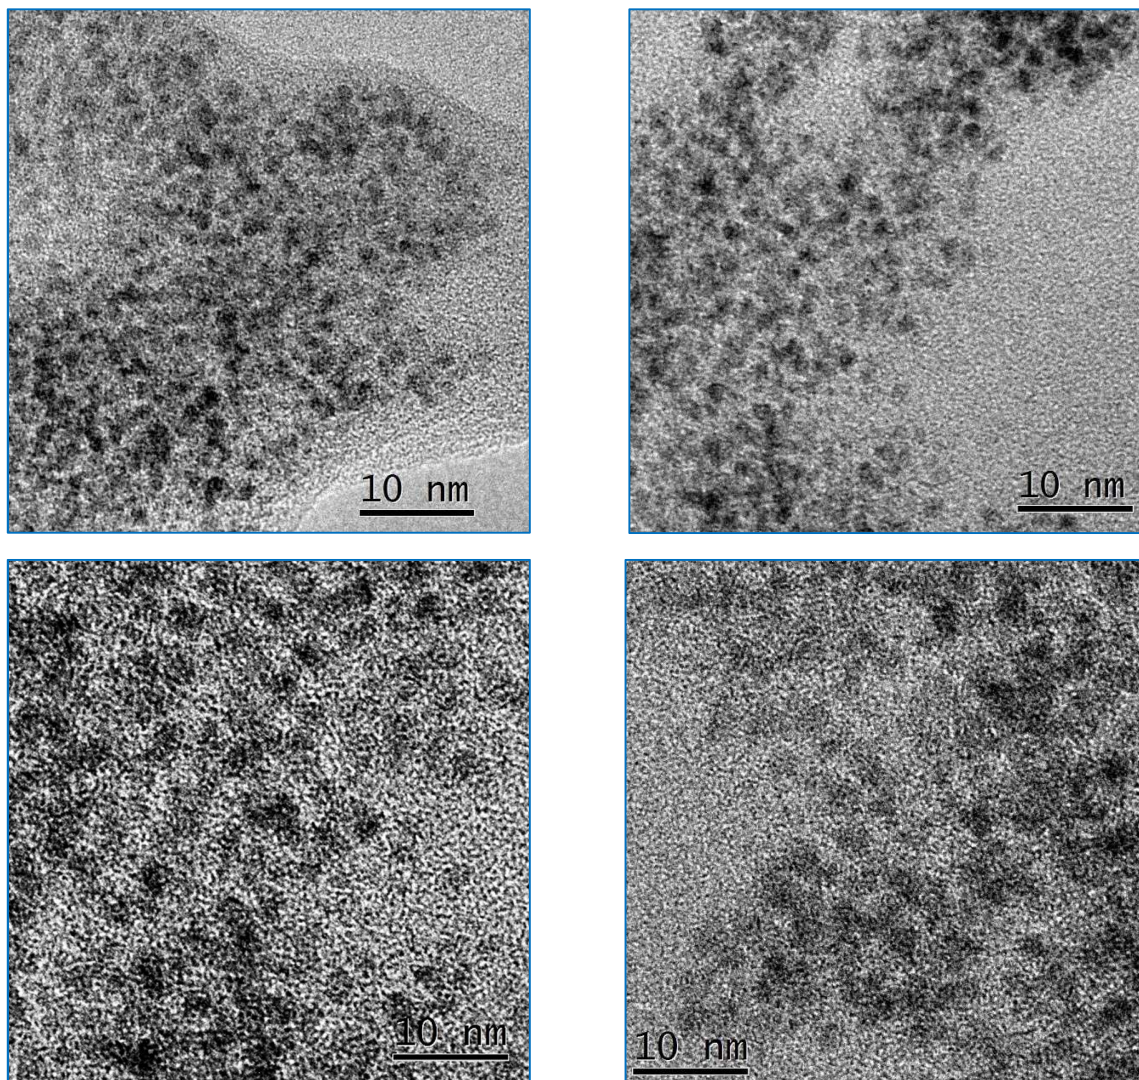

Size distribution and EDS

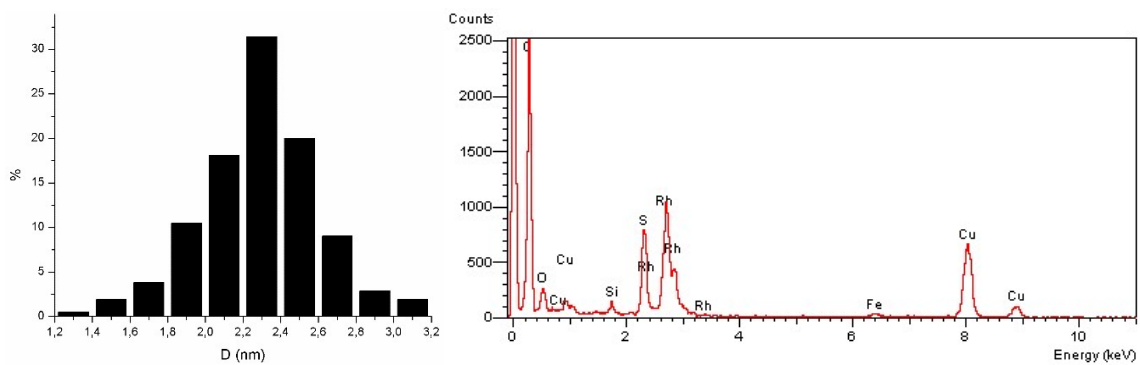

**Figure S19. TEM images of RhNPs-B after 10 catalytic runs in styrene hydrogenation**

Mean diameter  $D = 2.93 \pm 0.28$  nm

TEM Images

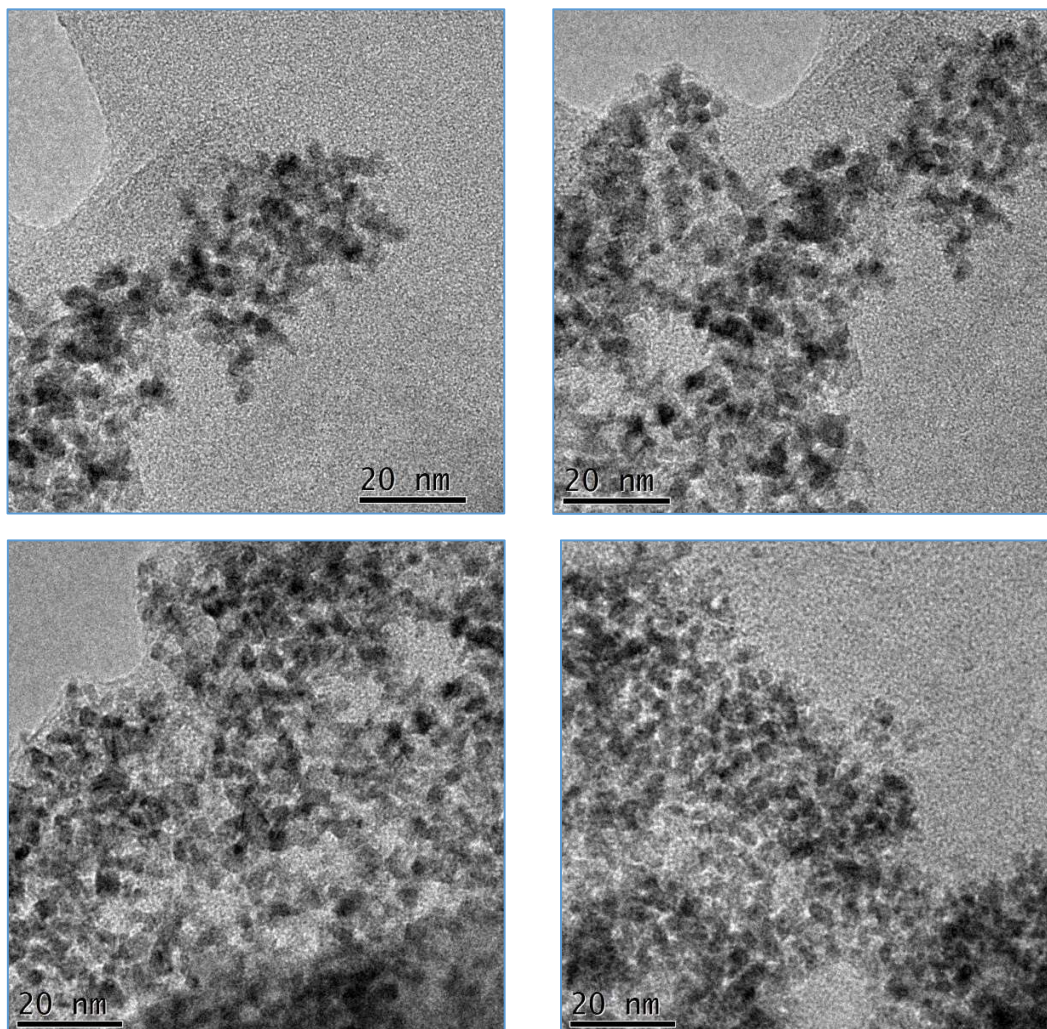

Size distribution and EDS

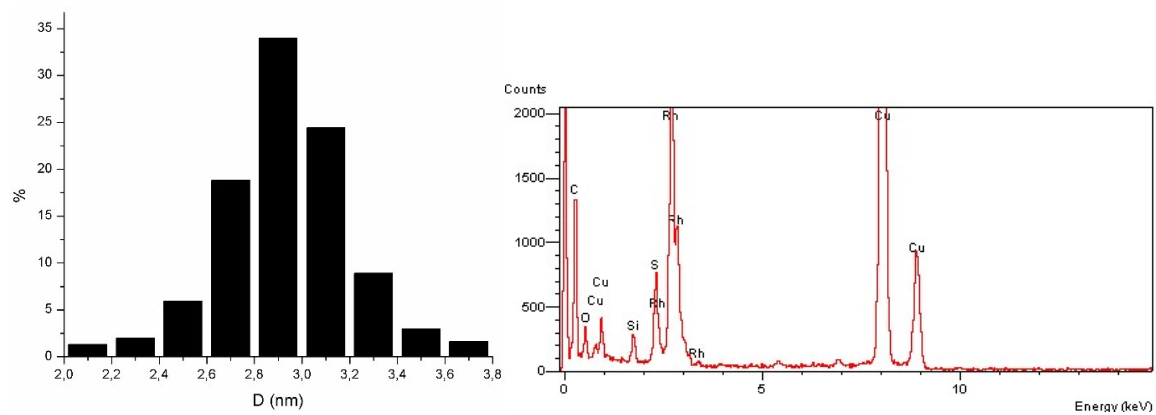

Figure S20. TEM images of RhNPs-B after 8 catalytic runs in *one-pot* multi-step synthesis of *N*-benzylaniline

TEM Images

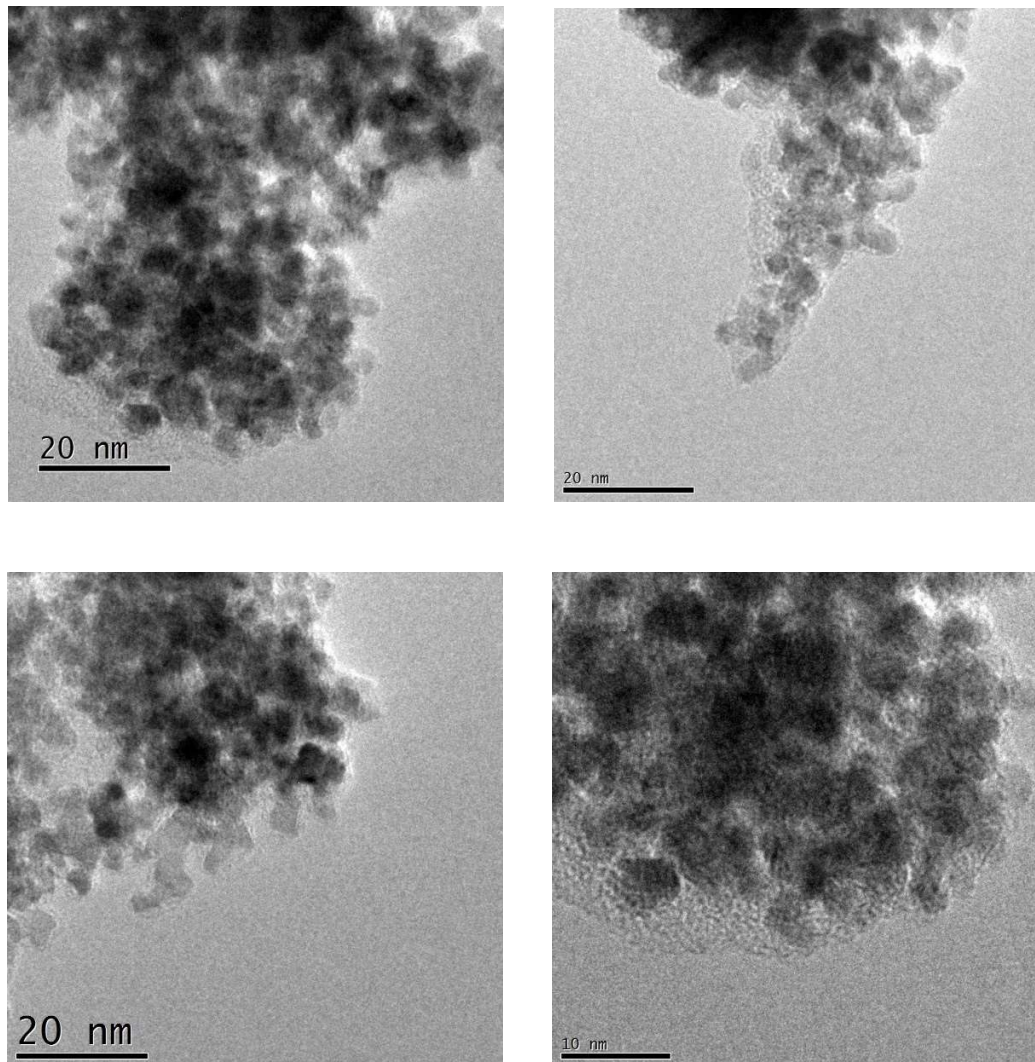

Figure S21. RhNPs-B XPS survey spectrum

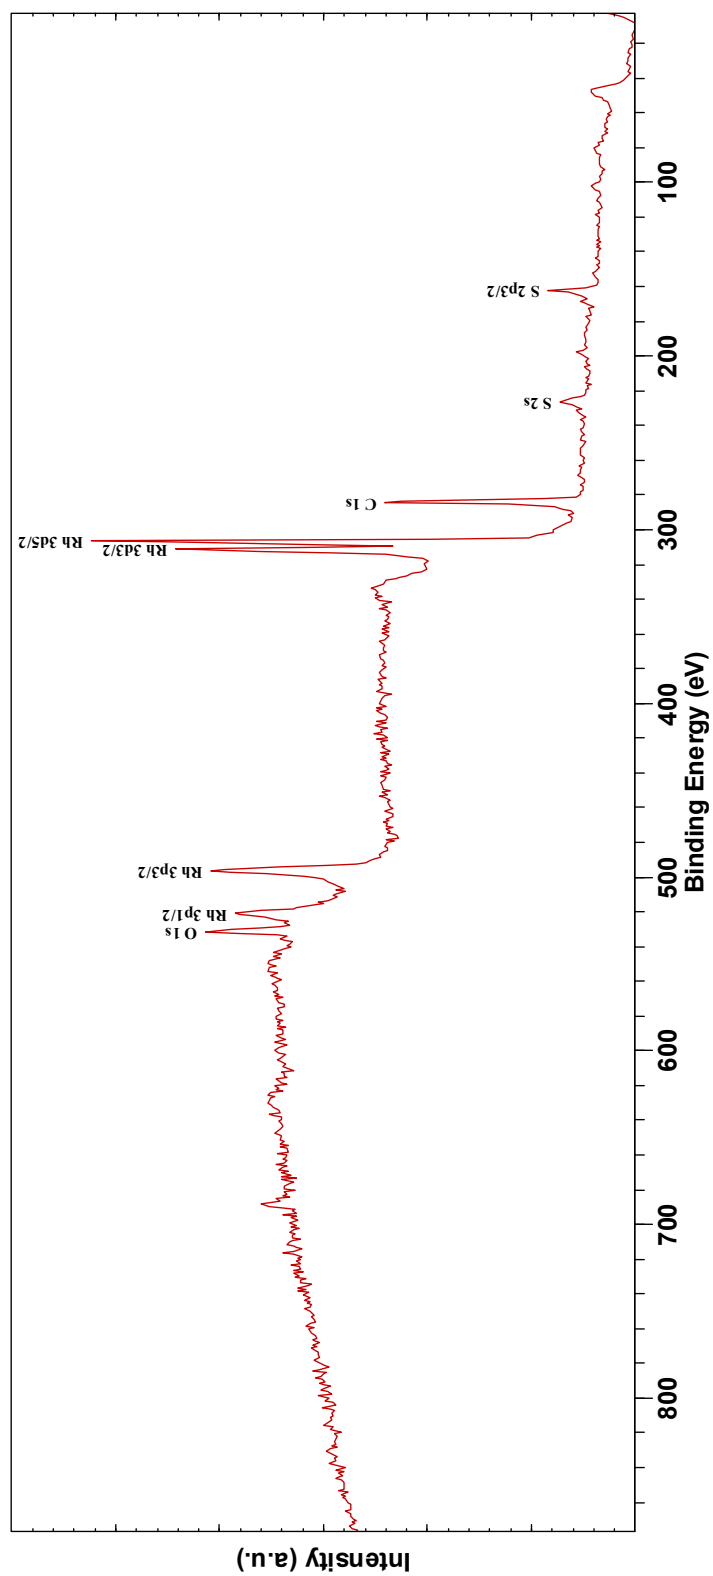

Figure S22. RhNPs-B high-resolution XPS spectra of Rh 3d and S 2s regions

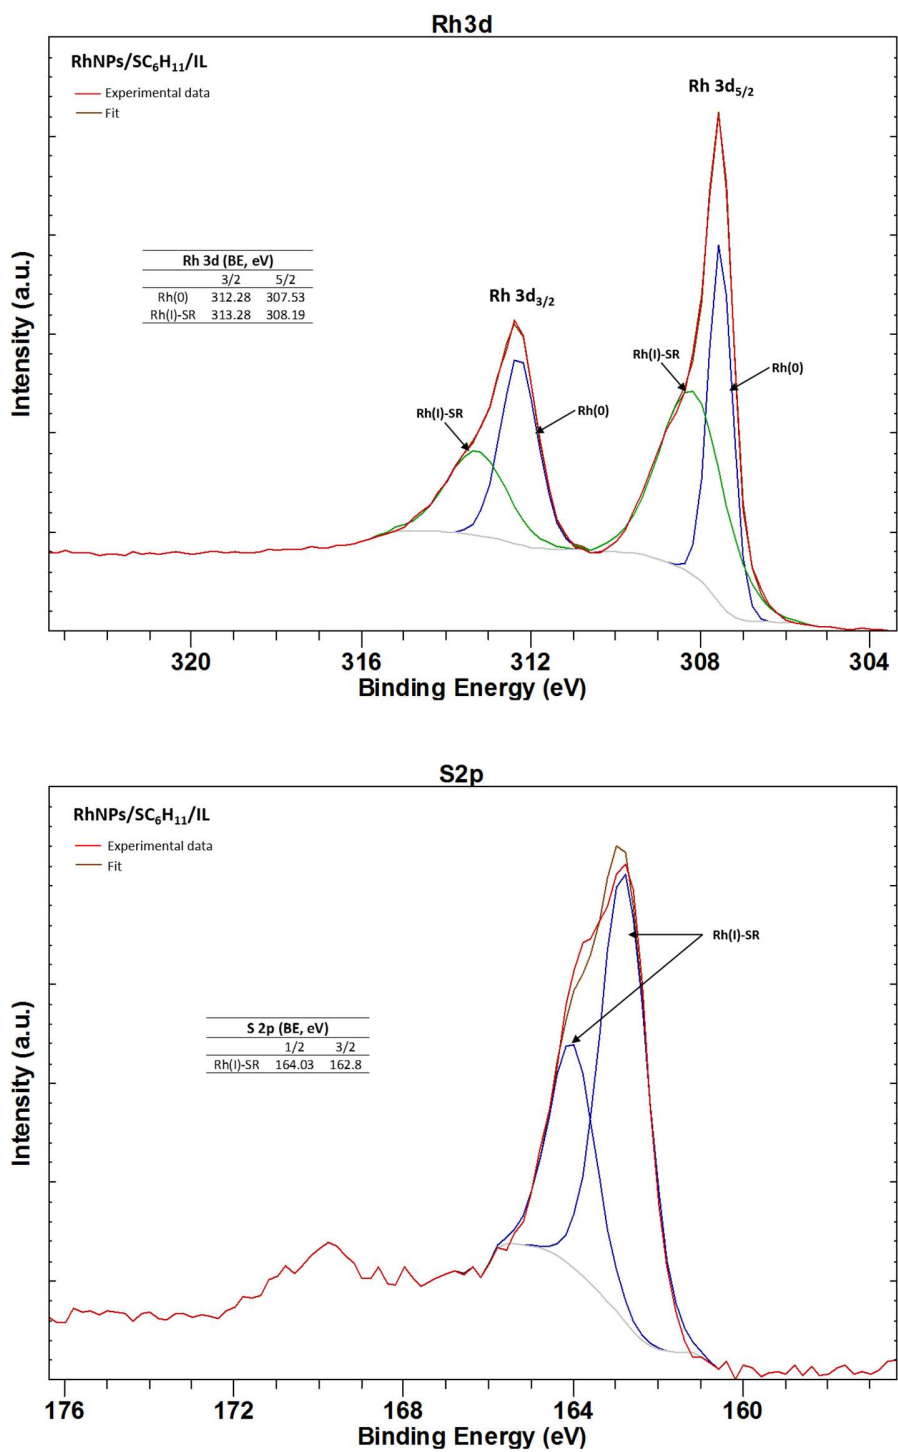



Figure S23. RhNPs-B/THF XPS survey spectrum

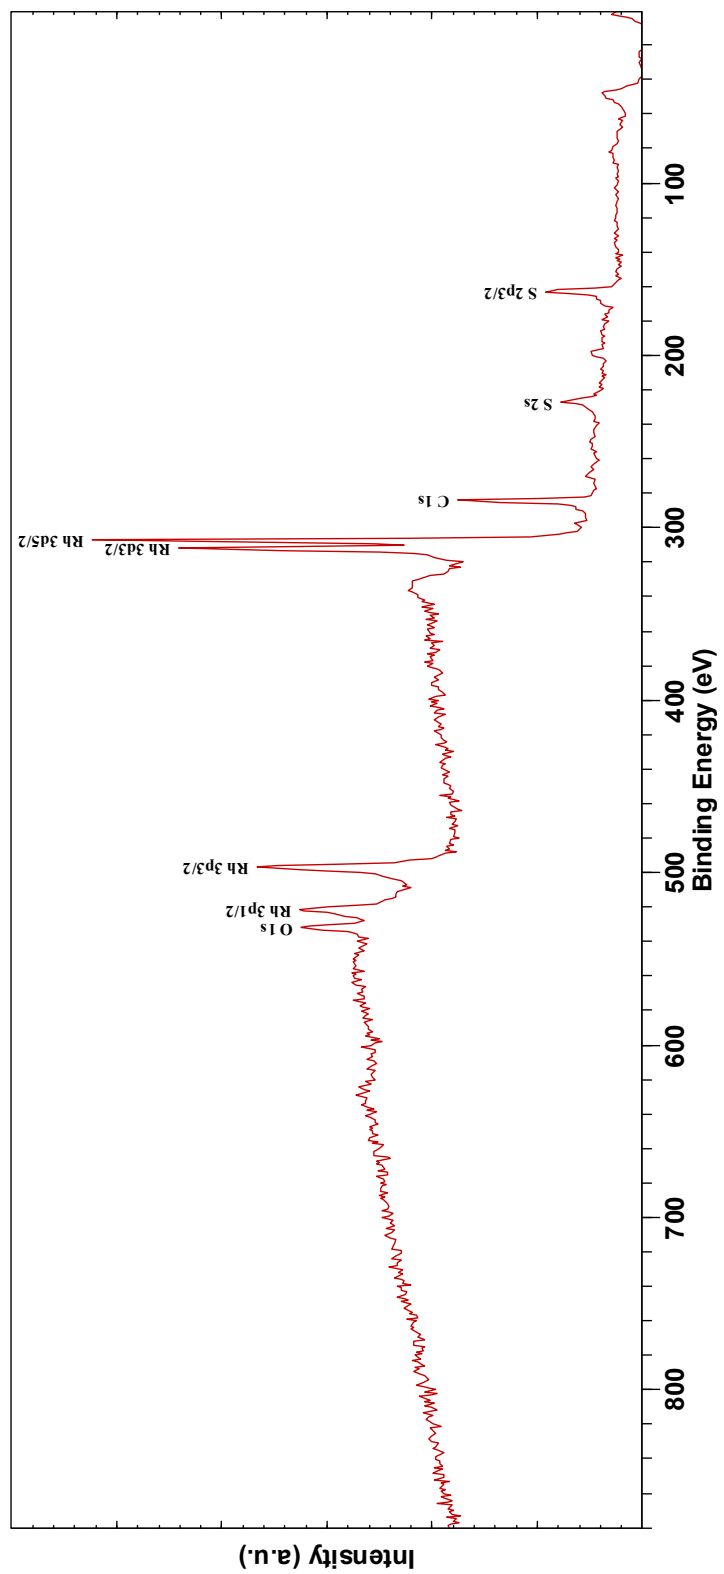

Figure S24. RhNPs-B/THF high-resolution XPS spectra of Rh 3d and S 2s regions

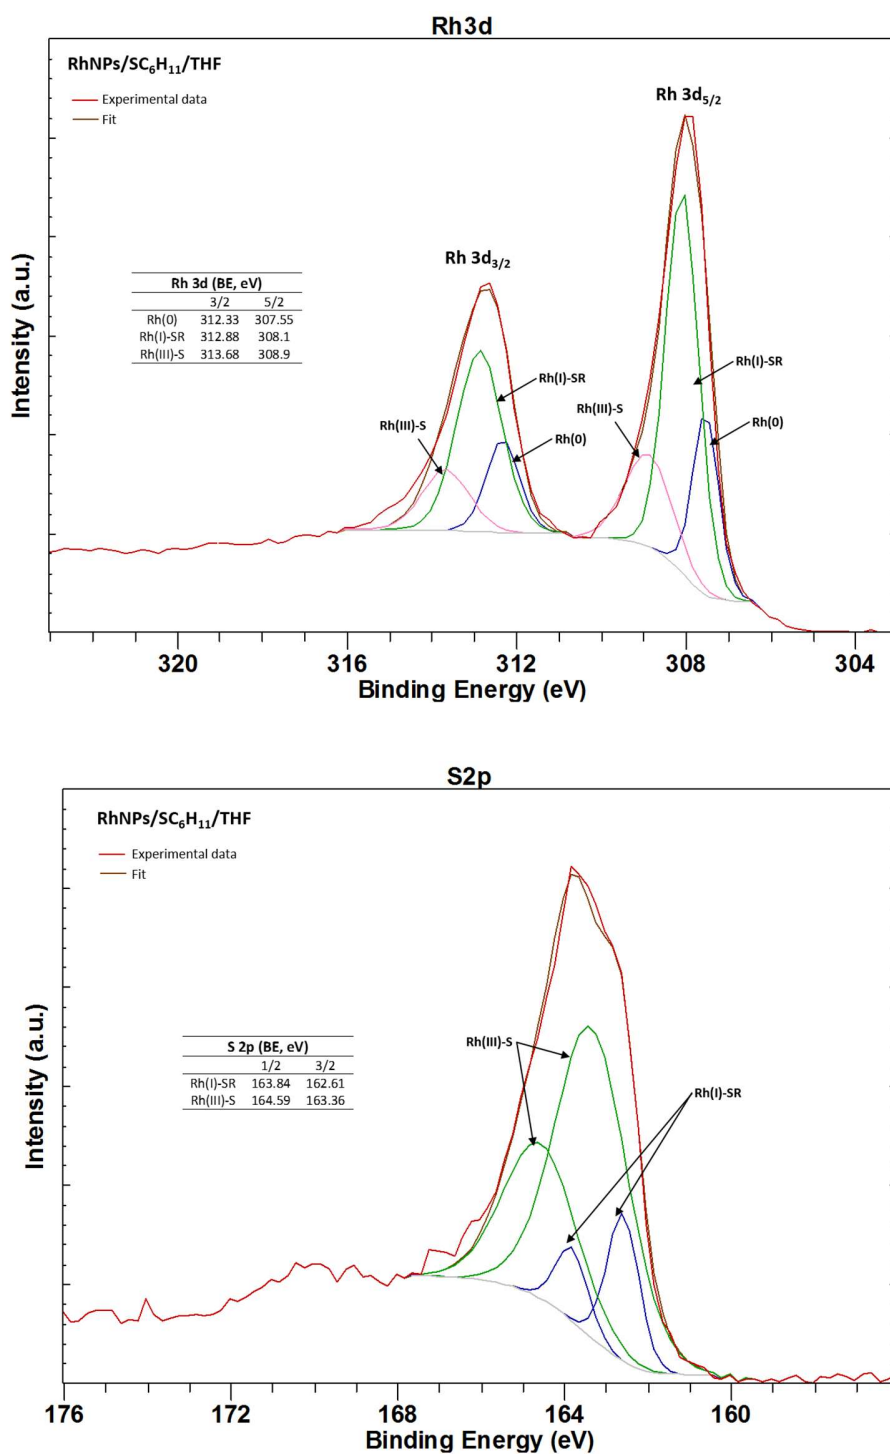

Figure S25.  $[\text{Rh}(\mu\text{-SC}_6\text{H}_{11})(\text{COD})]_2$  (II) high-resolution XPS spectra of Rh 3d and S 2s regions

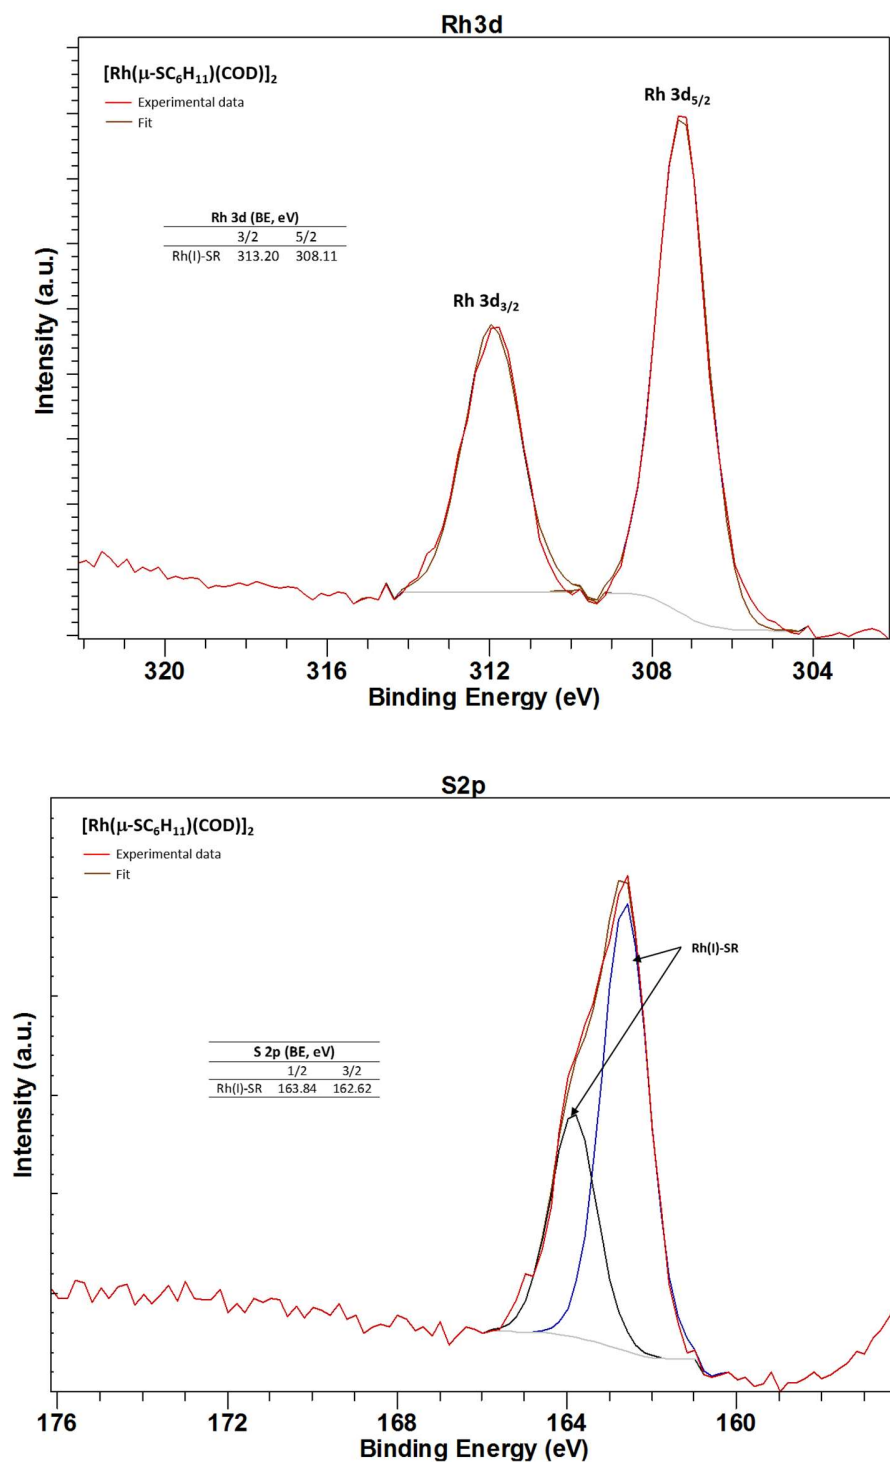

**Figure S26. Effect of the pressure on the hydrogenation of styrene (1) using RhNPs as catalyst.**

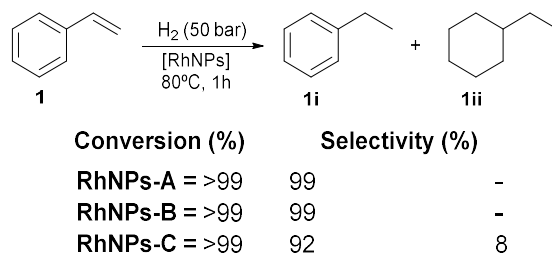

General conditions: 1 mmol of styrene (2) and 1 mL of the catalytic solution of **RhNPs** ( $10^{-2}$  mol L<sup>-1</sup>, 0.01 mmol of total Rh), 80°C, 1 hour.

**Figure S27. Effect of the pressure on the hydrogenation of styrene (1) using thiolate-RhNPs as catalyst.**

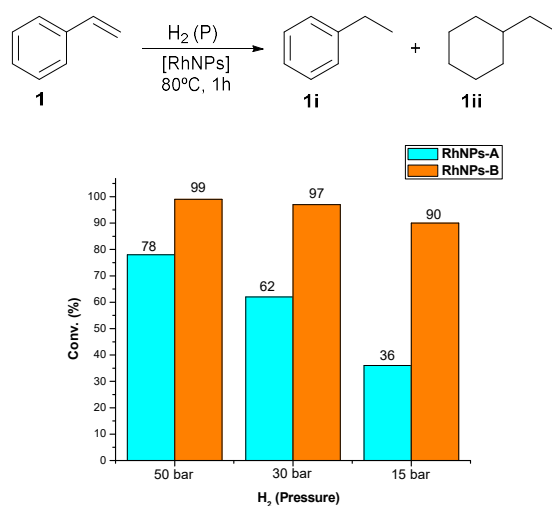

General conditions: 1 mmol of styrene (1) and 1 mL of the catalytic solution of **RhNPs** ( $10^{-2}$  mol L<sup>-1</sup>, 0.01 mmol of total Rh), 80°C, 1 hour.

**Table S1. Recycling experiments of styrene hydrogenation catalyzed by RhNPs-B**

| Catalytic run              | 1   | 2   | 3   | 4   | 5   | 6   | 7   | 8   | 9   | 10  |
|----------------------------|-----|-----|-----|-----|-----|-----|-----|-----|-----|-----|
| Conv. (%)                  | 90  | 93  | 91  | 90  | 92  | 88  | 92  | 93  | 89  | 87  |
| Ethylbenzene (1i) sel. (%) | 100 | 100 | 100 | 100 | 100 | 100 | 100 | 100 | 100 | 100 |

Recycling experiments of the catalytic system **RhNPs-B** in the hydrogenation of styrene (1). General conditions: 1 mmol of styrene (1) and 1 mL of the catalytic solution of **RhNPs-B** ( $10^{-2}$  mol L<sup>-1</sup>, 0.01 mmol of total Rh), 80°C,  $P = 15$  bar of H<sub>2</sub>, 1 hour.

**Figure S28. RhNPs-catalyzed acetophenone (2) hydrogenation**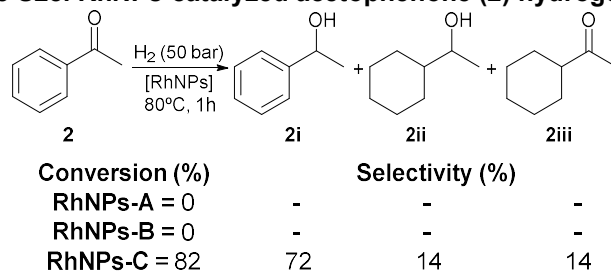**Figure S29. RhNPs-catalyzed benzaldehyde (3) hydrogenation**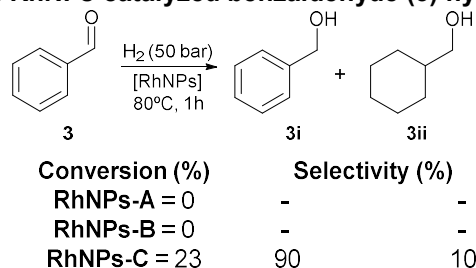**Table S2. Selectivity comparison of RhNPs catalyzed hydrogenation of 4-phenyl-3-buten-2-one (4)**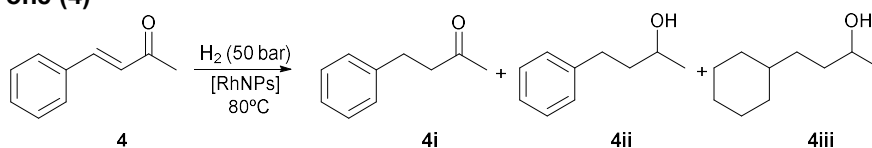

| Entry | Catalytic system | Time (h) | Conv. (%) <sup>a</sup> | Sel. <b>4i</b> (%) <sup>a</sup> | Sel. <b>4ii</b> (%) <sup>a</sup> | Sel. <b>4iii</b> (%) <sup>a</sup> |
|-------|------------------|----------|------------------------|---------------------------------|----------------------------------|-----------------------------------|
| 1     | <b>RhNPs-A</b>   | 1        | 25                     | >99                             | -                                | -                                 |
| 2     | <b>RhNPs-B</b>   | 1        | 78                     | >99                             | -                                | -                                 |
| 3     | <b>RhNPs-C</b>   | 1        | >99                    | 79                              | 11                               | 10                                |
| 4     | <b>RhNPs-A</b>   | 2        | 55                     | >99                             | -                                | -                                 |
| 5     | <b>RhNPs-B</b>   | 2        | 98                     | >99                             | -                                | -                                 |

Results from duplicated experiments. Reaction conditions: 1 mmol of 4-phenyl-3-buten-2-one and 1 mL of the catalytic solution of **RhNPs** ( $10^{-2}$  mol L<sup>-1</sup>, 0.01 mmol of total Rh), H<sub>2</sub> (50 bar), 80°C. <sup>a</sup> Determined by GC using decane as internal standard.

**Table S3. Recycling experiments of 4-phenyl-3-buten-2-one (4) hydrogenation catalyzed by RhNPs-B**

| Catalytic run                           | 1   | 2   | 3   | 4   | 5   | 6   | 7   | 8   | 9   | 10  |
|-----------------------------------------|-----|-----|-----|-----|-----|-----|-----|-----|-----|-----|
| Conv. (%)                               | 98  | 94  | 94  | 92  | 93  | 91  | 88  | 90  | 87  | 88  |
| 4-phenylbutanone ( <b>4i</b> ) sel. (%) | 100 | 100 | 100 | 100 | 100 | 100 | 100 | 100 | 100 | 100 |

Recycling experiments of the catalytic system **RhNPs-B** in the hydrogenation of 4-phenyl-3-buten-2-one (**4**). General conditions: 1 mmol of 4-phenyl-3-buten-2-one (**4**) and 1 mL of the catalytic solution of **RhNPs-B** ( $10^{-2}$  mol L<sup>-1</sup>, 0.01 mmol of total Rh), 80°C, *P* = 50 bar of H<sub>2</sub>, 1 hour.

**Figure S30. Evolution of conversion in the RhNPs-catalyzed hydrogenation of 4-nitroacetophenone (5)**

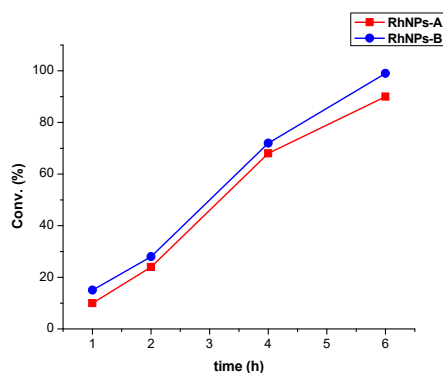

General conditions: 1 mmol of 4-nitroacetophenone and 1 mL of the catalytic solution of **RhNPs** ( $10^{-2}$  mol L<sup>-1</sup>, 0.01 mmol of total Rh), 80°C, *P* = 50 bar of H<sub>2</sub>.

**Table S4. RhNPs-B catalyzed hydrogenation of *N*-benzylidenaniline (10)**

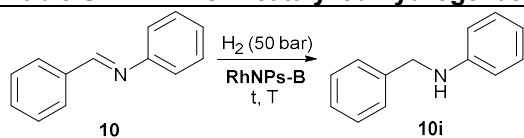

| Entry | Time (h) | Temp. (°C) | Conv. (Sel.) (%) <sup>a</sup> |
|-------|----------|------------|-------------------------------|
| 1     | 1        | 80         | 5 (>99)                       |
| 2     | 2        | 80         | 21 (>99)                      |
| 3     | 2        | 100        | 27 (>99)                      |
| 4     | 8        | 100        | 97 (>99)                      |

Results from duplicated experiments. Reaction conditions: 1 mmol of *N*-benzylidenaniline and 1 mL of the catalytic solution of **RhNPs-B** ( $10^{-2}$  mol L<sup>-1</sup>, 0.01 mmol of total Rh), H<sub>2</sub> (50 bar), 80°C. <sup>a</sup> Determined by GC using decane as internal standard.

**Table S5 RhNPs-B catalyzed one-pot two-step synthesis of *N*-benzylaniline**

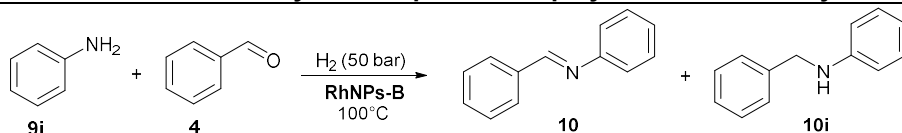

| Entry | Time (h) | Conv. (%) <sup>a</sup> | Selectivity <b>10/10i</b> (%) <sup>a</sup> |
|-------|----------|------------------------|--------------------------------------------|
| 1     | 4        | >99                    | 40/60                                      |
| 2     | 8        | >99                    | 11/89                                      |
| 3     | 18       | >99                    | 3/97                                       |

Results from duplicated experiments. Reaction conditions: 1 mmol of aniline (**9i**), 1 mmol of benzaldehyde (**4**) and 1 mL of the catalytic solution of **RhNPs-B** ( $10^{-2}$  mol L<sup>-1</sup>, 0.01 mmol of total Rh), H<sub>2</sub> (50 bar), 100°C. <sup>a</sup> Determined by GC using decane as internal standard.

Figure S31. <sup>1</sup>H NMR monitoring of RhNPs-A catalyzed hydrogenation of 4-nitroacetophenone (5)

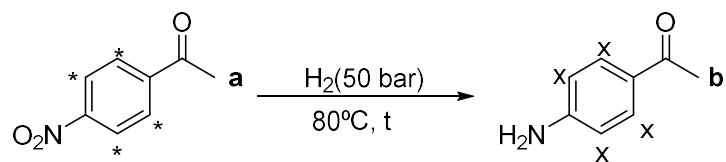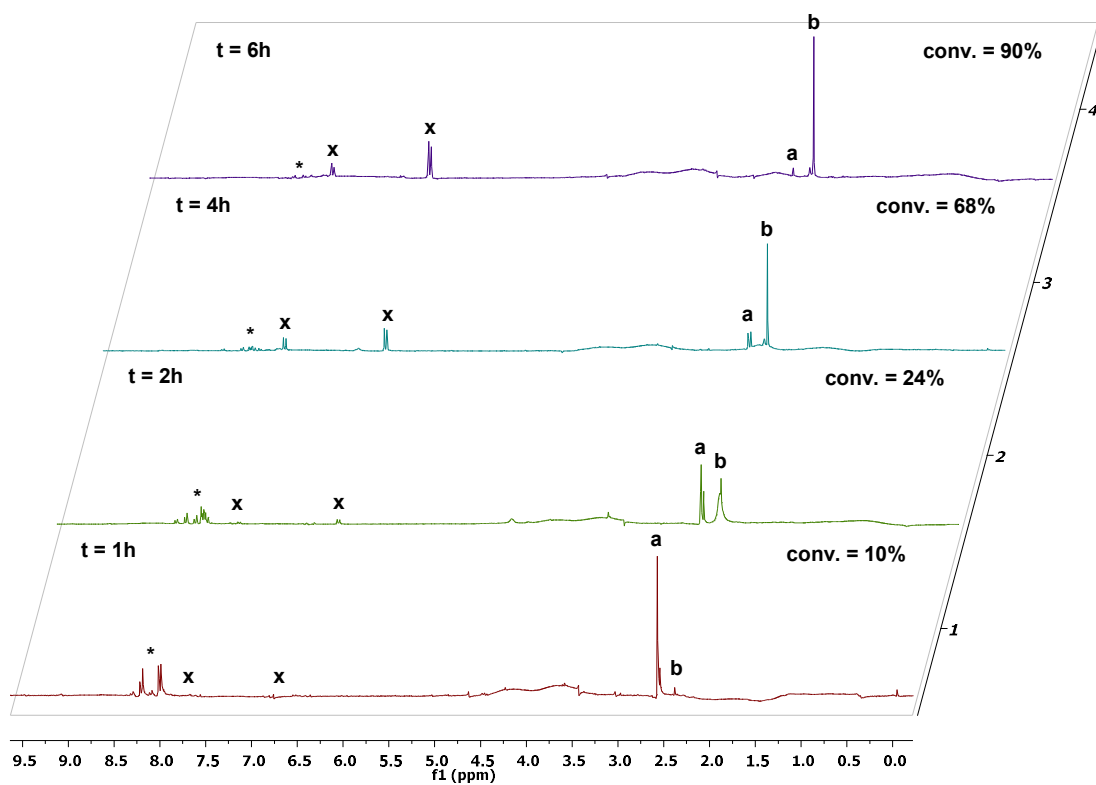

Figure S32.  $^1\text{H}$  NMR monitoring of RhNPs-B catalyzed hydrogenation of 4-nitroacetophenone (5)

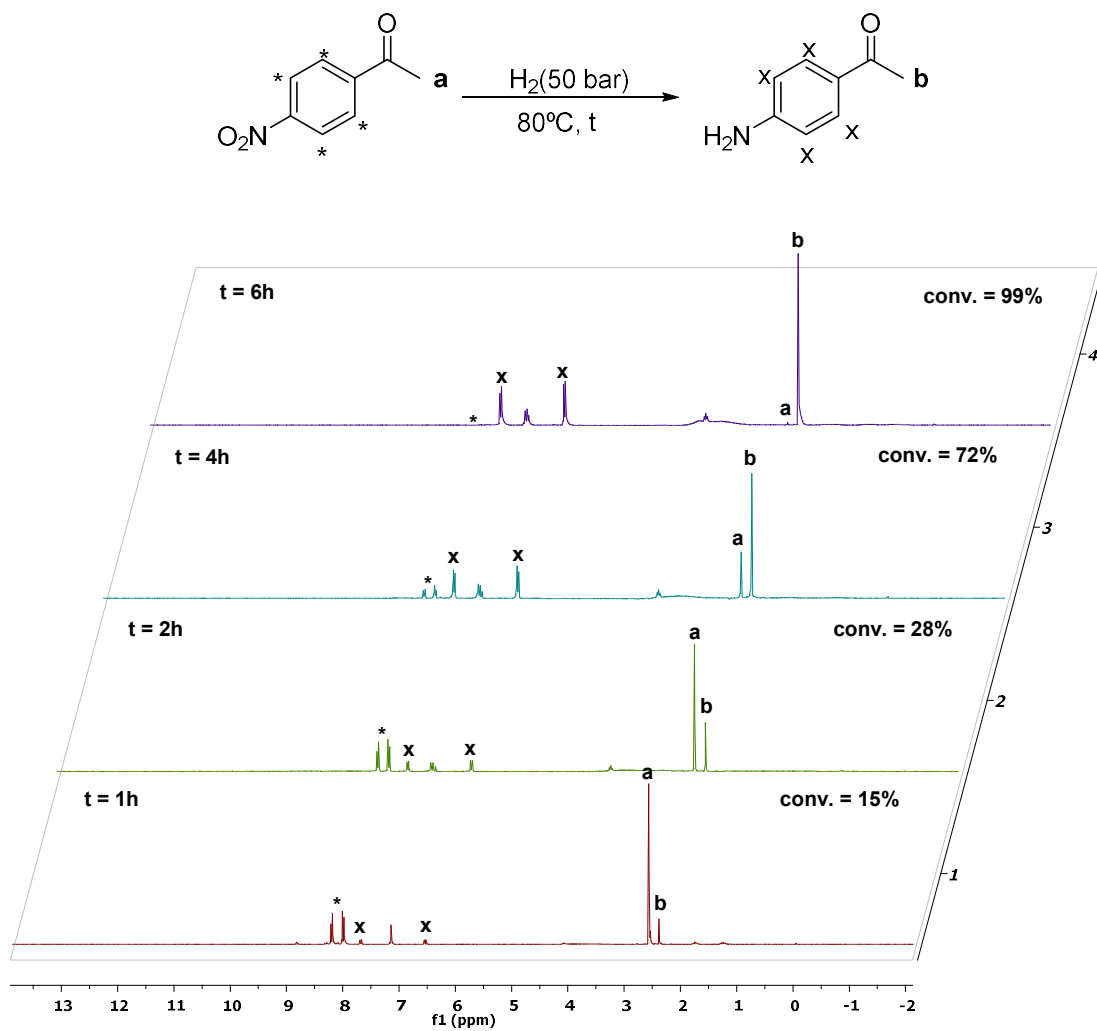



Figure S33. <sup>1</sup>H NMR monitoring of RhNPs-B catalyzed hydrogenation of *p*-benzoquinone (8)

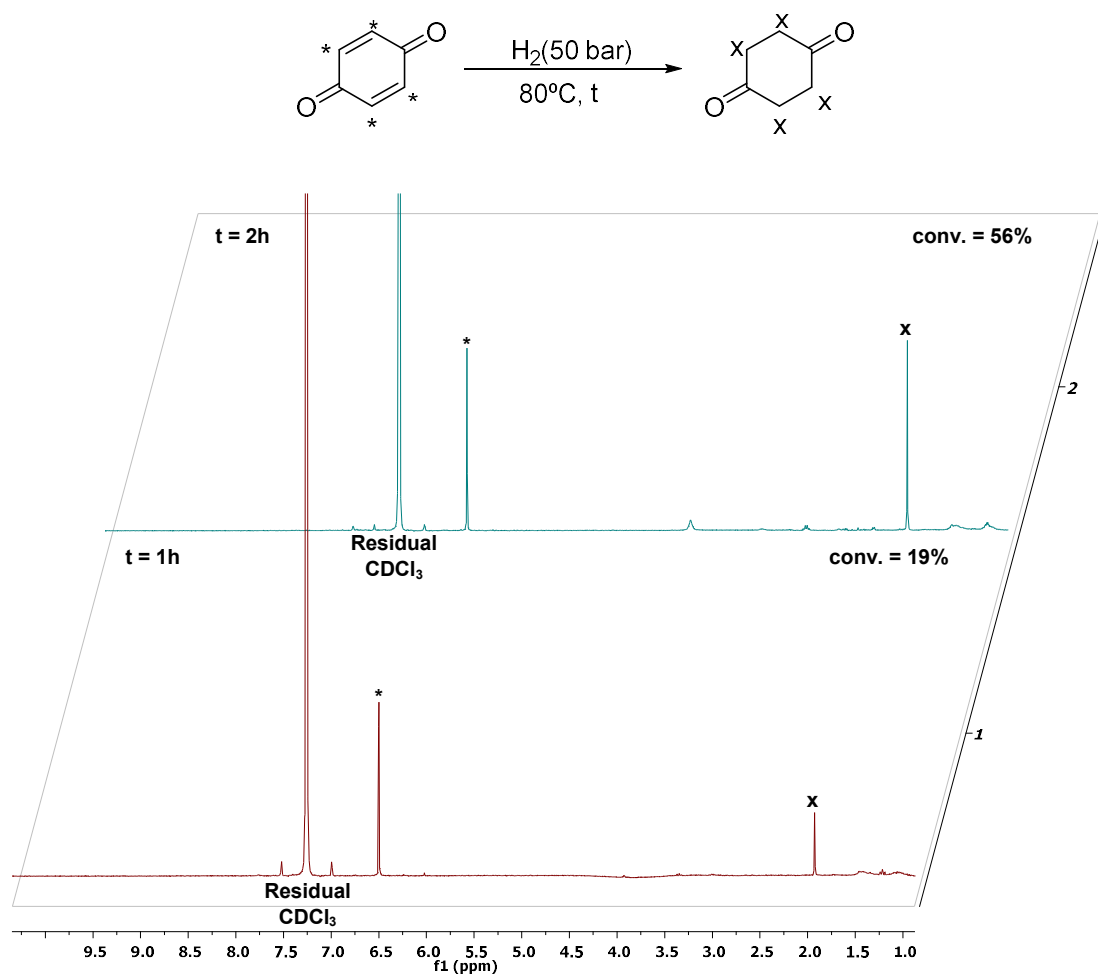

Figure S34. <sup>1</sup>H NMR spectrum of RhNPs-C-catalyzed hydrogenation of *p*-benzoquinone (8)

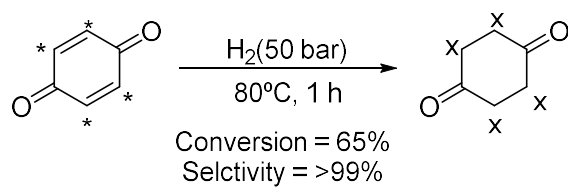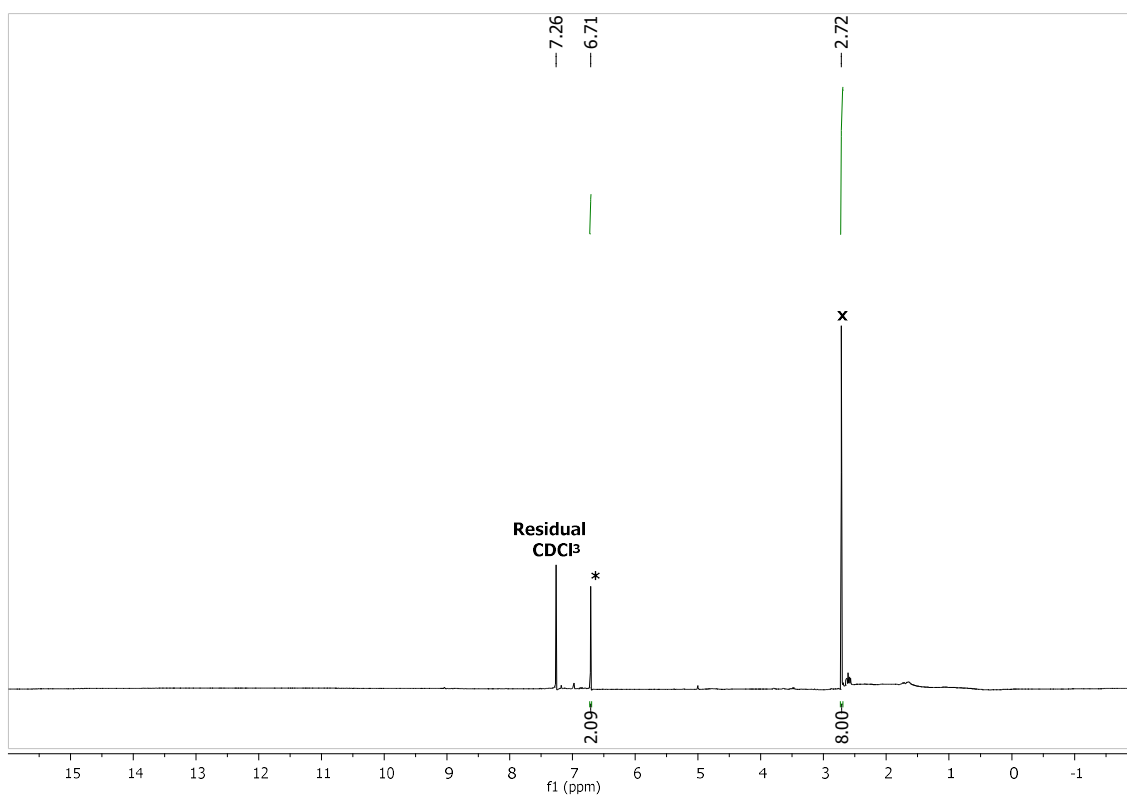

Figure S35. <sup>1</sup>H NMR of 4-aminoacetophenone. Hydrogenation product of 4-nitroacetophenone (5) catalyzed by RhNPs-C

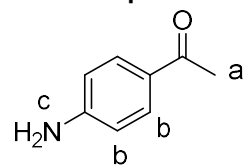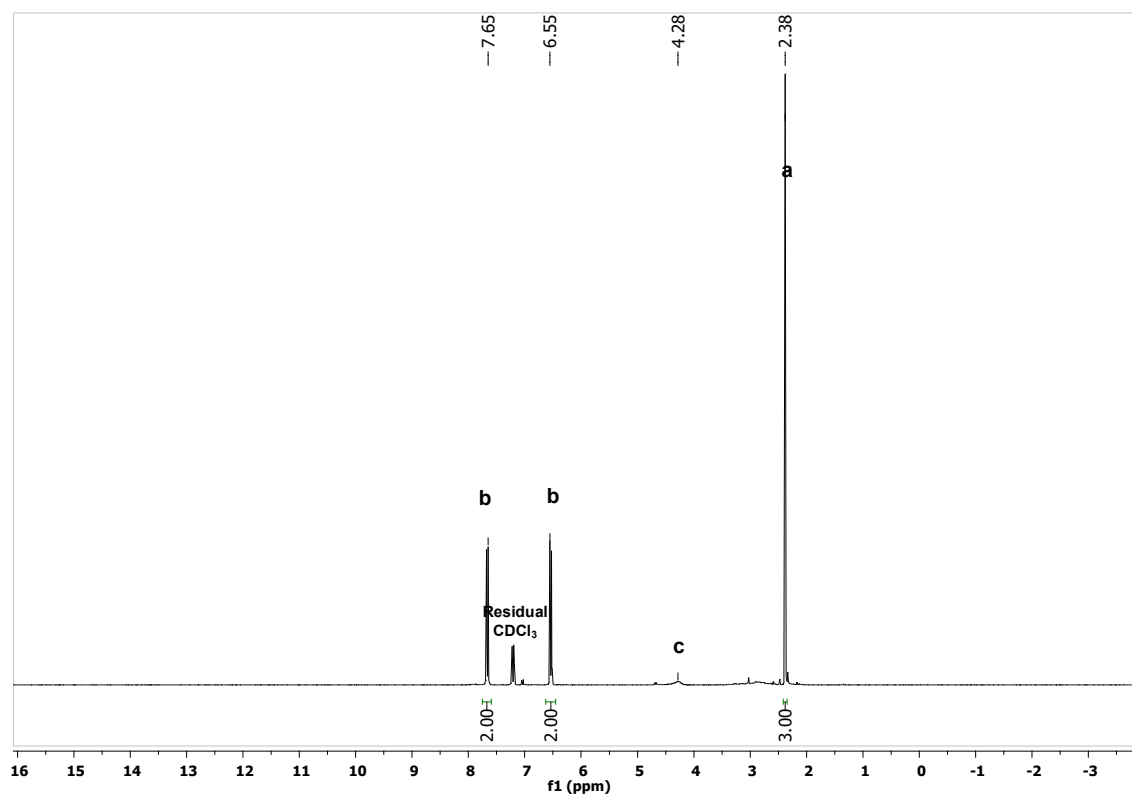

Figure S36. <sup>1</sup>H NMR of *N*-benzylaniline (product 10i)

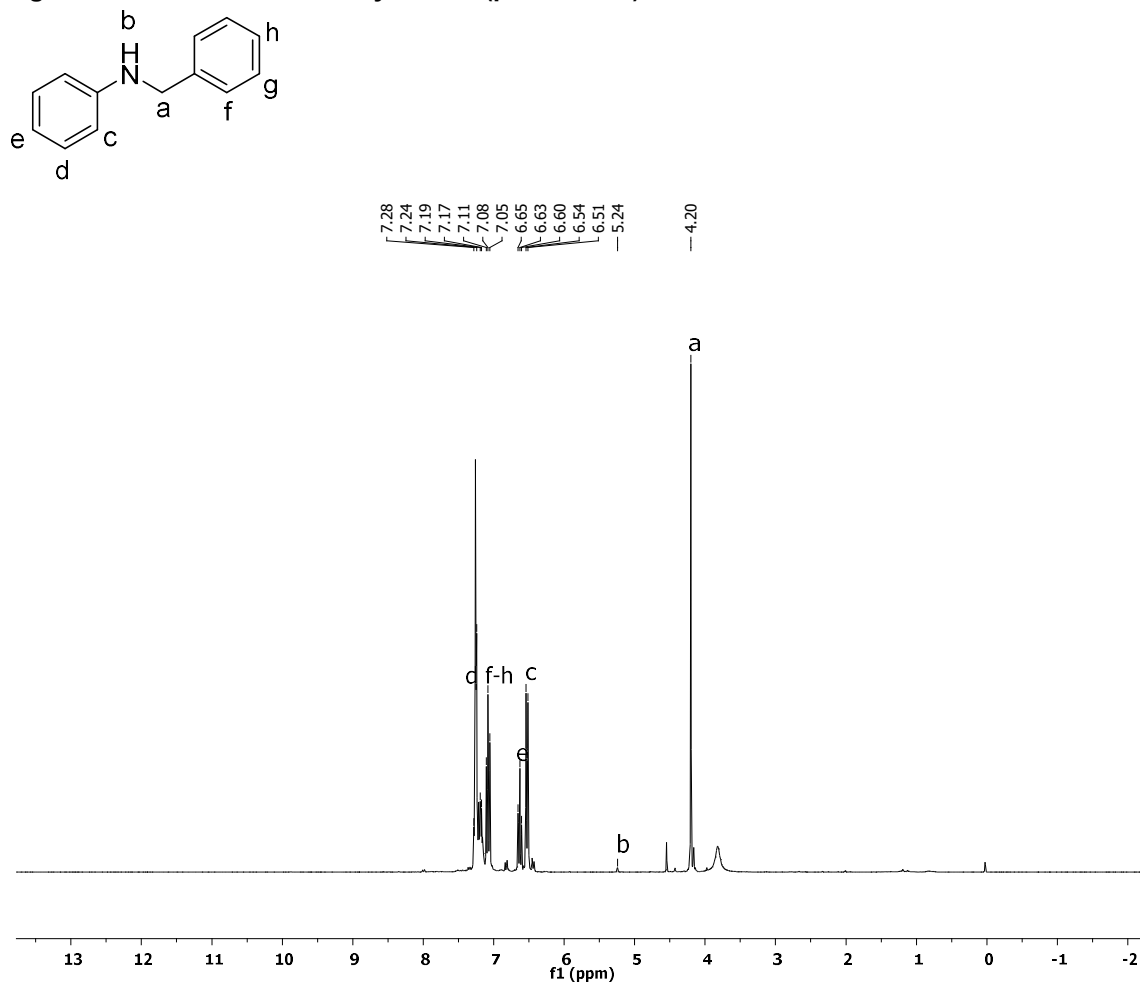

**Table S6. Crystal data and structure refinement for [Rh( $\mu$ -SC<sub>12</sub>H<sub>25</sub>)(COD)]<sub>2</sub> (I)**

|                                   |                                                                   |                                                                        |
|-----------------------------------|-------------------------------------------------------------------|------------------------------------------------------------------------|
| Identification code               | [Rh( $\mu$ -SC <sub>12</sub> H <sub>25</sub> )(COD)] <sub>2</sub> |                                                                        |
| Empirical formula                 | C <sub>40</sub> H <sub>74</sub> Rh <sub>2</sub> S <sub>2</sub>    |                                                                        |
| Formula weight                    | 824.93                                                            |                                                                        |
| Temperature                       | 100(2) K                                                          |                                                                        |
| Wavelength                        | 0.71073 Å                                                         |                                                                        |
| Crystal system                    | Monoclinic                                                        |                                                                        |
| Space group                       | P 21/m                                                            |                                                                        |
| Unit cell dimensions              | a = 8.734(3) Å<br>b = 26.987(8) Å<br>c = 8.390(2) Å               | $\alpha = 90^\circ$ .<br>$\beta = 90^\circ$ .<br>$\gamma = 90^\circ$ . |
| Volume                            | 1977.6(10) Å <sup>3</sup>                                         |                                                                        |
| Z                                 | 2                                                                 |                                                                        |
| Density (calculated)              | 1.385 Mg/m <sup>3</sup>                                           |                                                                        |
| Absorption coefficient            | 0.966 mm <sup>-1</sup>                                            |                                                                        |
| F(000)                            | 872                                                               |                                                                        |
| Crystal size                      | 0.100 x 0.050 x 0.010 mm <sup>3</sup>                             |                                                                        |
| Theta range for data collection   | 2.264 to 26.842°                                                  |                                                                        |
| Index ranges                      | -11 ≤ h ≤ 11, -34 ≤ k ≤ 34, -10 ≤ l ≤ 10                          |                                                                        |
| Reflections collected             | 55203                                                             |                                                                        |
| Independent reflections           | 4314 [R(int) = 0.0881]                                            |                                                                        |
| Completeness to theta = 25.242°   | 99.9 %                                                            |                                                                        |
| Absorption correction             | Semi-empirical from equivalents                                   |                                                                        |
| Max. and min. transmission        | 0.7454 and 0.5740                                                 |                                                                        |
| Refinement method                 | Full-matrix least-squares on F <sup>2</sup>                       |                                                                        |
| Data / restraints / parameters    | 4314 / 1335 / 461                                                 |                                                                        |
| Goodness-of-fit on F <sup>2</sup> | 1.129                                                             |                                                                        |
| Final R indices [I > 2σ(I)]       | R1 = 0.0479, wR2 = 0.0972                                         |                                                                        |
| R indices (all data)              | R1 = 0.0613, wR2 = 0.1026                                         |                                                                        |
| Extinction coefficient            | n/a                                                               |                                                                        |
| Largest diff. peak and hole       | 0.676 and -1.108 e.Å <sup>-3</sup>                                |                                                                        |

**Table S7. Crystal data and structure refinement of [Rh( $\mu$ -SC<sub>6</sub>H<sub>11</sub>)(COD)]<sub>2</sub> (II)**

|                                   |                                                                                                      |                                |
|-----------------------------------|------------------------------------------------------------------------------------------------------|--------------------------------|
| Identification code               | [Rh( $\mu$ -SC <sub>6</sub> H <sub>11</sub> )(COD)] <sub>2</sub>                                     |                                |
| Empirical formula                 | C <sub>31</sub> H <sub>53</sub> Rh <sub>2</sub> S <sub>2</sub> · 0.5 C <sub>12</sub> H <sub>14</sub> |                                |
| Formula weight                    | 695.67                                                                                               |                                |
| Temperature                       | 100(2) K                                                                                             |                                |
| Wavelength                        | 0.71073 Å                                                                                            |                                |
| Crystal system                    | Monoclinic                                                                                           |                                |
| Space group                       | P 2 <sub>1</sub> /n                                                                                  |                                |
| Unit cell dimensions              | a = 10.8550(4) Å                                                                                     | $\alpha = 90^\circ$ .          |
|                                   | b = 28.6007(12) Å                                                                                    | $\beta = 119.2390(10)^\circ$ . |
|                                   | c = 10.8441(4) Å                                                                                     | $\gamma = 90^\circ$ .          |
| Volume                            | 2937.7(2) Å <sup>3</sup>                                                                             |                                |
| Z                                 | 4                                                                                                    |                                |
| Density (calculated)              | 1.573 Mg/m <sup>3</sup>                                                                              |                                |
| Absorption coefficient            | 1.284 mm <sup>-1</sup>                                                                               |                                |
| F(000)                            | 1444                                                                                                 |                                |
| Crystal size                      | 0.100 x 0.050 x 0.010 mm <sup>3</sup>                                                                |                                |
| Theta range for data collection   | 2.150 to 28.311°.                                                                                    |                                |
| Index ranges                      | -14 ≤ h ≤ 12, 38 ≤ k ≤ 0, 14 ≤ l ≤ 0                                                                 |                                |
| Reflections collected             | 7462                                                                                                 |                                |
| Independent reflections           | 7304 [R(int) = 0.0763]                                                                               |                                |
| Completeness to theta = 25.000°   | 99.90%                                                                                               |                                |
| Absorption correction             | None                                                                                                 |                                |
| Max. and min. transmission        | 0.8621 and 0.5872                                                                                    |                                |
| Refinement method                 | Full-matrix least-squares on F <sup>2</sup>                                                          |                                |
| Data / restraints / parameters    | 7304 / 0 / 287                                                                                       |                                |
| Goodness-of-fit on F <sup>2</sup> | 1.092                                                                                                |                                |
| Final R indices [I > 2σ(I)]       | R1 = 0.0609, wR2 = 0.1195                                                                            |                                |
| R indices (all data)              | R1 = 0.0751, wR2 = 0.1255                                                                            |                                |
| Extinction coefficient            | n/a                                                                                                  |                                |
| Largest diff. peak and hole       | 1.749 and -1.418 e.Å <sup>-3</sup>                                                                   |                                |
